# Supplementary material
Source: PubMed Central journal article supplement (PMC4274750)
Supplement: NIHMS641235-supplement-2.pdf [file NIHMS641235-supplement-2.pdf]

Sup. Fig 1. (Wang)

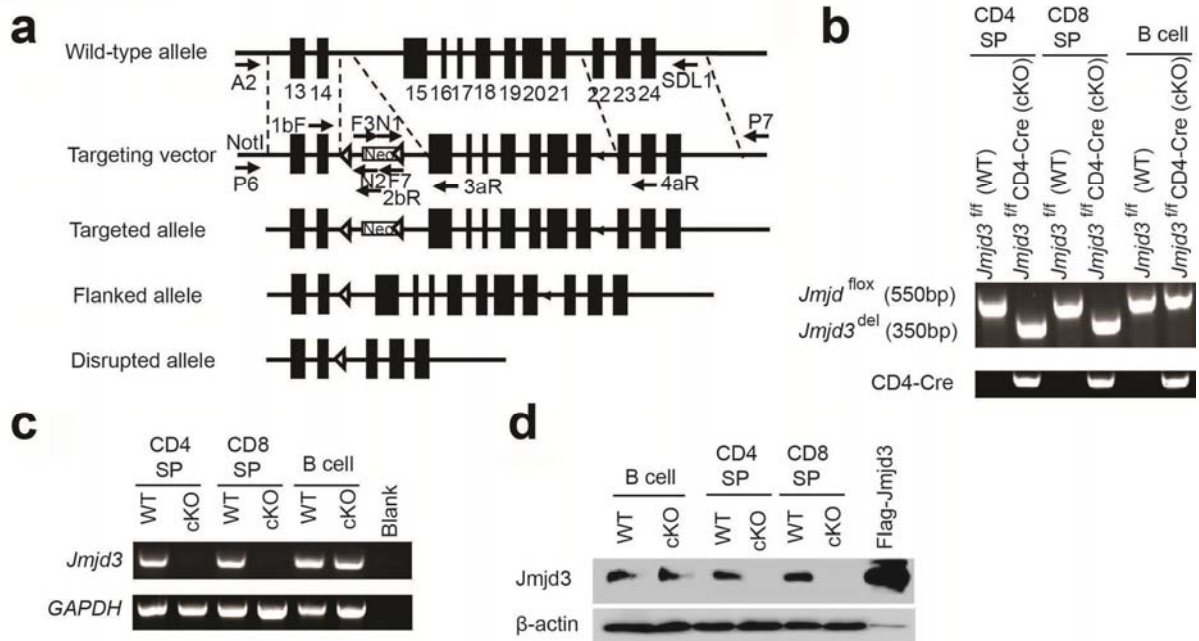

**Supplementary Figure 1 | Generation of T cell-specific *Jmjd3*-deficient (*Jmjd3* cKO) mice.**

(a) *Jmjd3*<sup>fl/fl</sup> (*Jmjd3*<sup>fl/fl</sup>) mice were generated by targeting exons 15-21 (encoding the JmjC-catalytic domain) using a Cre-LoxP system and then crossed with CD4-Cre mice. (b) *Jmjd3* cKO mice were identified by PCR genotyping. (c) RT-PCR and (d) western blot analyses were done to confirm the loss of *Jmjd3* mRNA and protein in *Jmjd3*-deficient T cells, respectively.

Sup. Fig. 2. (Wang)

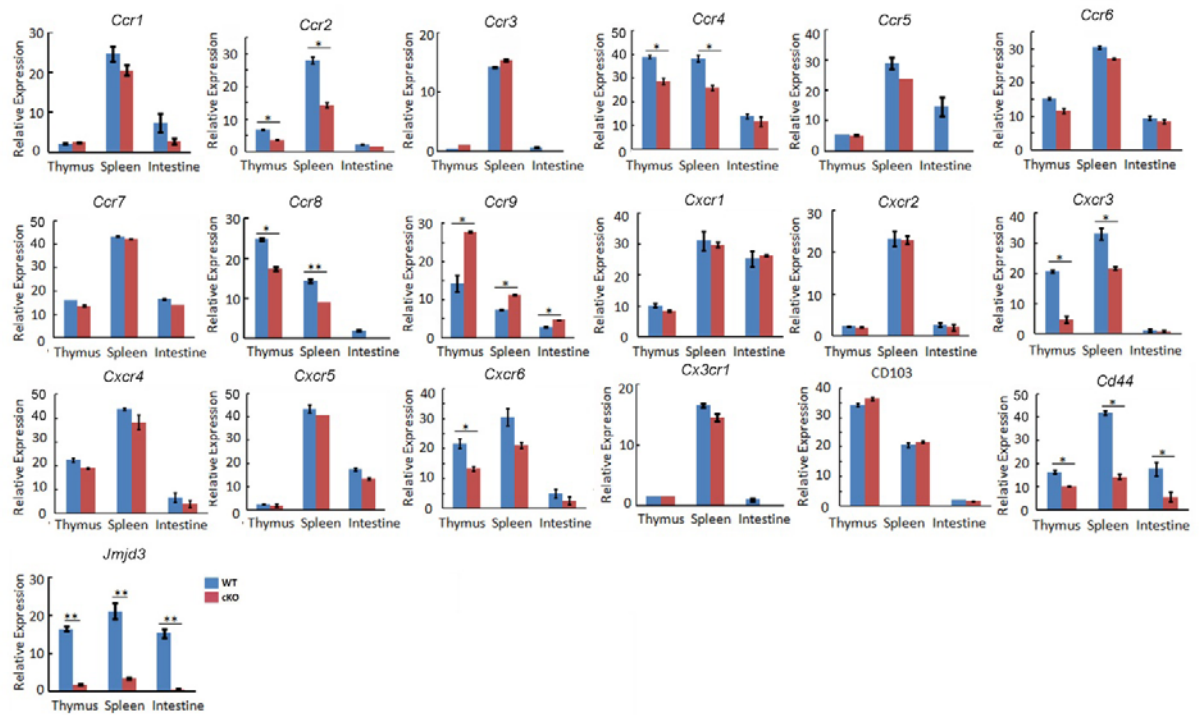

**Supplementary Figure 2** | qPCR analysis of gene expression of chemokine receptors in CD4<sup>+</sup> T cells isolated from thymus, spleen, and intestine.

Sup. Fig. 3 (Wang)

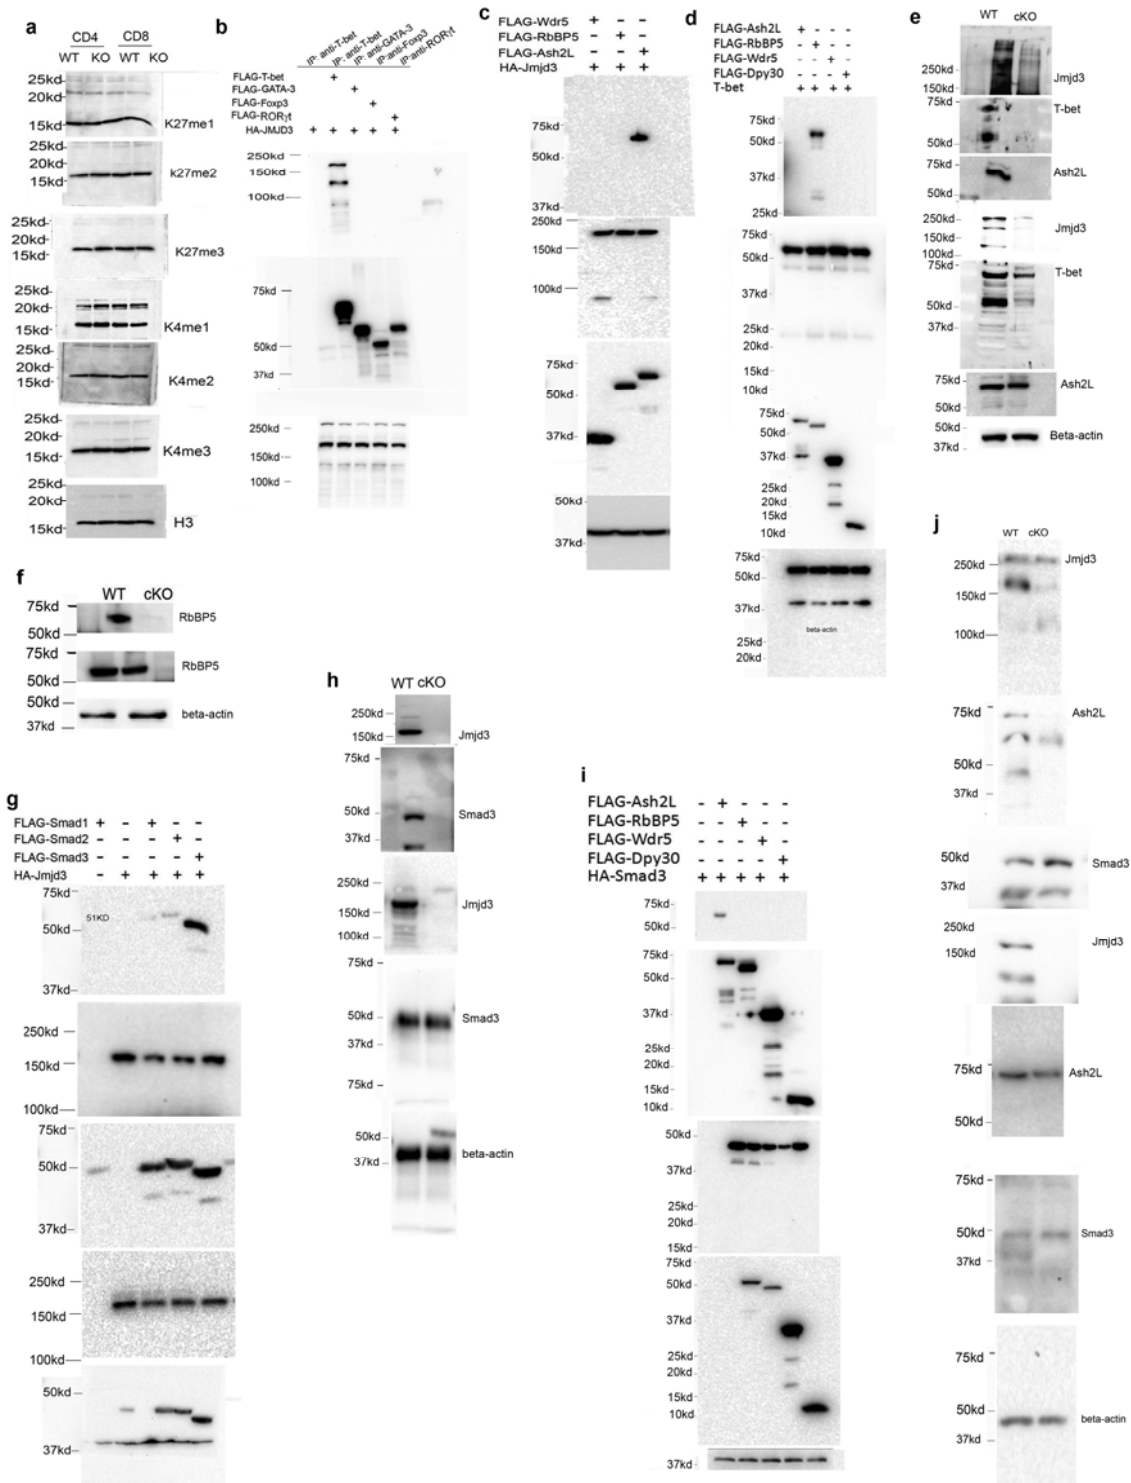

**Supplementary Figure 3** | The full blots of western shown in Figure 6 and 7. The molecular weight markers are listed on the left. The lanes are labeled on the top .

Sup. Fig. 4 (Wang)

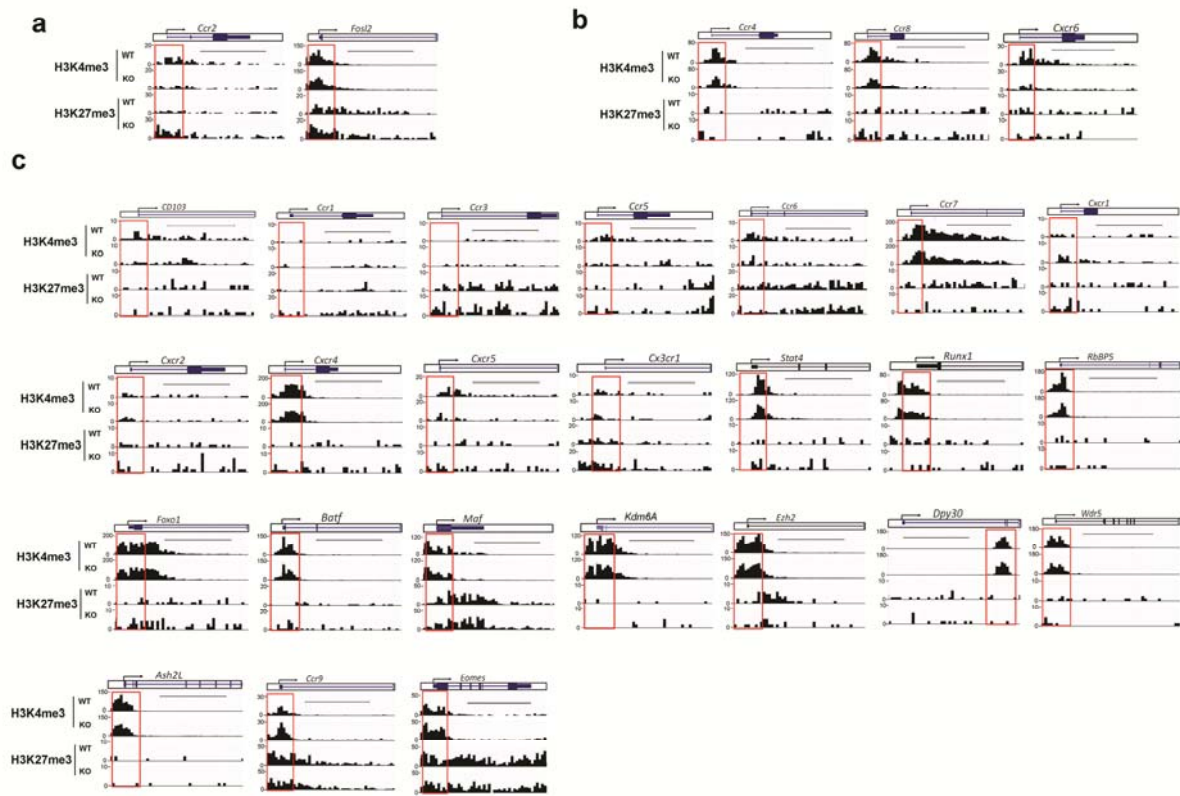

**Supplementary Figure 4** | Groups of H3K4me3 and H3K27me3 methylation on ChIP-seq analysis of chemokine receptors and transcription factors. Chemokine receptors were classified into three groups based on H3K4me3 and H3K27me3 modifications in WT and *Jmjd3* cKO CD4 SP thymocytes: group I, increased H3K27 and decreased H3K4; group II, unchanged H3K27 and decreased H3K4; and group III, unchanged H3K27 and H3K4. Red frames indicate the 2 kb region around the TSS. Scale bars represent 5kb region.

Sup Fig. 5 (Wang)

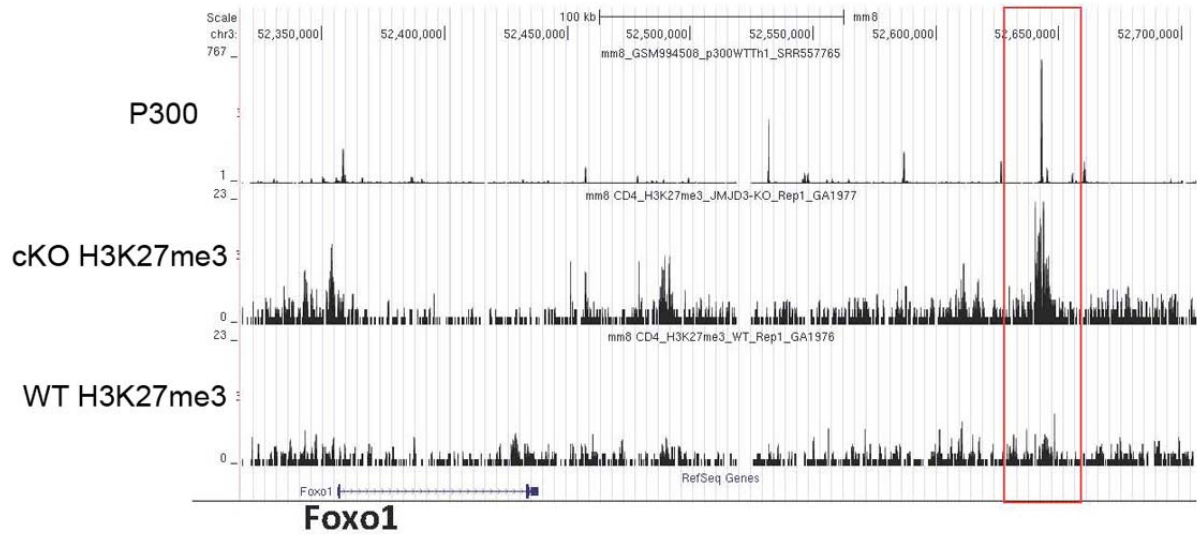

**Supplementary Figure 5** | ChiP-seq analysis with sequencing reads counted at 4Kb windows centered at p300. H3K27me3 methylation analysis on enhancer region of Foxo1 in *Jmjd3*-deficient CD4<sup>+</sup> T cells compared with WT cells.

Sup. Fig. 6 (Wang)

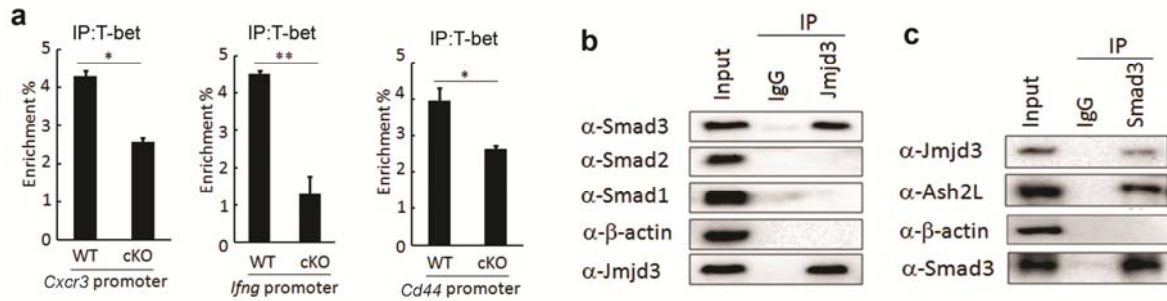

**Supplementary Figure 6 | Jmjd3 regulates the interaction with T-bet and Smad3.** (a) Jmjd3 regulates T-bet binding to target genes in CD4<sup>+</sup> thymocytes. (b) Endogenous Jmjd3 specifically interacts with Smad3 in Treg cells. (c) Endogenous Smad3 interacts with Jmjd3 and Ash2L in Treg cells.

Sup Fig. 7 (Wang)

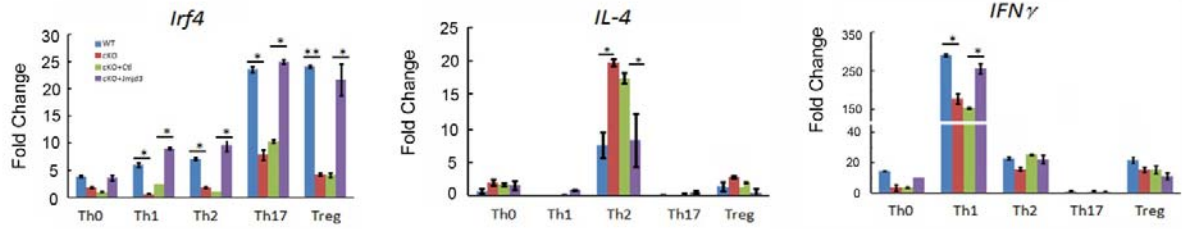

**Supplementary Figure 7** | Ectopically expressed Jmjd3 rescued the gene expression in Jmjd3-deficient T cells.

**Supplementary Table 1. ChIP-sequence analysis of H3K4 and H3K27 methylation +/- 2kb around TSS (p<0.0001)**

**Supplementary Table 1a. H3K27 methylation upregulation in *Jmjd3* cKO CD4 T cells**

| Gene.Symbol   | Ensembl.ID         | KO     | WT     | Adj.Pvalue | KO/WT |
|---------------|--------------------|--------|--------|------------|-------|
| LOC100045969  | ENSMUSG00000027639 | 389.79 | 83.46  | 1.73E-51   | 4.67  |
| FAM102A       | ENSMUSG00000039157 | 217.83 | 18.55  | 7.52E-44   | 11.74 |
| IRF4          | ENSMUSG00000021356 | 309.54 | 78.83  | 2.71E-35   | 3.93  |
| Egr2          | ENSMUSG00000037868 | 243.62 | 46.37  | 1.98E-34   | 5.25  |
| CCND2         | ENSMUSG00000000184 | 286.61 | 69.55  | 4.14E-34   | 4.12  |
| LFNG          | ENSMUSG00000029570 | 524.50 | 227.21 | 3.64E-32   | 2.31  |
| CHL1          | ENSMUSG00000030077 | 384.06 | 136.79 | 4.15E-31   | 2.81  |
| LOC100046682  | ENSMUSG00000028042 | 183.43 | 27.82  | 1.70E-29   | 6.59  |
| Raph1         | ENSMUSG00000026014 | 507.30 | 231.84 | 2.07E-28   | 2.19  |
| SMAD7         | ENSMUSG00000025880 | 449.98 | 197.07 | 5.02E-27   | 2.28  |
| RTN4RL1       | ENSMUSG00000045287 | 292.34 | 95.06  | 3.05E-26   | 3.08  |
| UBASH3B       | ENSMUSG00000032020 | 275.15 | 88.10  | 4.42E-25   | 3.12  |
| D630039A03Rik | ENSMUSG00000052117 | 257.95 | 81.14  | 5.96E-24   | 3.18  |
| EDARADD       | ENSMUSG00000039309 | 306.68 | 118.24 | 3.51E-22   | 2.59  |
| 2610019F03Rik | ENSMUSG00000050052 | 263.68 | 92.74  | 1.82E-21   | 2.84  |
| DUSP4         | ENSMUSG00000031530 | 438.52 | 215.61 | 2.56E-21   | 2.03  |
| MDFIC         | ENSMUSG00000041390 | 200.63 | 55.64  | 4.45E-21   | 3.61  |
| PMEPA1        | ENSMUSG00000038400 | 212.09 | 62.60  | 5.40E-21   | 3.39  |
| ANTXR2        | ENSMUSG00000029338 | 117.51 | 13.91  | 6.12E-21   | 8.45  |
| Il18r1        | ENSMUSG00000026070 | 386.93 | 180.84 | 1.07E-20   | 2.14  |
| ID2           | ENSMUSG00000020644 | 424.19 | 208.66 | 1.21E-20   | 2.03  |
| BCL11B        | ENSMUSG00000048251 | 143.31 | 27.82  | 6.74E-20   | 5.15  |
| 6430527G18Rik | ENSMUSG00000034168 | 143.31 | 27.82  | 6.74E-20   | 5.15  |
| ST3GAL1       | ENSMUSG00000013846 | 111.78 | 13.91  | 1.57E-19   | 8.04  |
| dusp5         | ENSMUSG00000034765 | 85.98  | 4.64   | 8.04E-19   | 18.54 |
| TNFRSF1B      | ENSMUSG00000028599 | 128.98 | 23.18  | 9.24E-19   | 5.56  |
| plk3          | ENSMUSG00000028680 | 160.50 | 39.41  | 9.25E-19   | 4.07  |
| A230083G16Rik | ENSMUSG00000055818 | 140.44 | 30.14  | 3.36E-18   | 4.66  |
| Susd3         | ENSMUSG00000021384 | 292.34 | 127.51 | 1.33E-17   | 2.29  |
| foxp4         | ENSMUSG00000023991 | 103.18 | 13.91  | 2.02E-17   | 7.42  |
| plcb3         | ENSMUSG00000024960 | 266.55 | 111.28 | 3.28E-17   | 2.40  |
| rarA          | ENSMUSG00000037992 | 206.36 | 71.87  | 4.61E-17   | 2.87  |
| CD44          | ENSMUSG00000005087 | 312.41 | 146.06 | 9.63E-17   | 2.14  |
| ETS1          | ENSMUSG00000032035 | 94.58  | 11.59  | 1.15E-16   | 8.16  |
| ST6GALNAC1    | ENSMUSG00000078586 | 189.16 | 62.60  | 1.25E-16   | 3.02  |
| Gm9997        | ENSMUSG00000056391 | 235.02 | 92.74  | 1.64E-16   | 2.53  |
| Rnu6          | ENSMUSG00000065683 | 143.31 | 37.09  | 4.42E-16   | 3.86  |



|               |                    |        |        |          |       |
|---------------|--------------------|--------|--------|----------|-------|
| PTMS          | ENSMUSG00000030122 | 143.31 | 37.09  | 4.42E-16 | 3.86  |
| klf2          | ENSMUSG00000055148 | 249.35 | 104.33 | 4.49E-16 | 2.39  |
| FKBP5         | ENSMUSG00000024222 | 123.24 | 27.82  | 1.85E-15 | 4.43  |
| TEC           | ENSMUSG00000029217 | 200.63 | 74.19  | 2.02E-15 | 2.70  |
| dtx1          | ENSMUSG00000029603 | 315.27 | 155.33 | 2.33E-15 | 2.03  |
| Rem2          | ENSMUSG00000022176 | 257.95 | 113.60 | 2.33E-15 | 2.27  |
| UNC93B1       | ENSMUSG00000036908 | 203.49 | 76.51  | 2.57E-15 | 2.66  |
| nin           | ENSMUSG00000021068 | 220.69 | 88.10  | 2.73E-15 | 2.51  |
| Hectd2        | ENSMUSG00000041180 | 223.56 | 90.42  | 3.26E-15 | 2.47  |
| RNF122        | ENSMUSG00000039328 | 117.51 | 25.50  | 3.28E-15 | 4.61  |
| PARP8         | ENSMUSG00000021725 | 154.77 | 46.37  | 3.33E-15 | 3.34  |
| ifitm3        | ENSMUSG00000025492 | 309.54 | 153.02 | 5.06E-15 | 2.02  |
| FAM83G        | ENSMUSG00000042377 | 212.09 | 83.46  | 5.07E-15 | 2.54  |
| MBOAT1        | ENSMUSG00000038732 | 137.57 | 37.09  | 5.82E-15 | 3.71  |
| B230312A22Rik | ENSMUSG00000036002 | 229.29 | 97.37  | 1.72E-14 | 2.35  |
| CISH          | ENSMUSG00000032578 | 206.36 | 83.46  | 5.09E-14 | 2.47  |
| FAM49A        | ENSMUSG00000020589 | 111.78 | 25.50  | 6.09E-14 | 4.38  |
| PHLDB3        | ENSMUSG00000061511 | 120.38 | 30.14  | 6.16E-14 | 3.99  |
| 1700016A09Rik | ENSMUSG00000042840 | 120.38 | 30.14  | 6.16E-14 | 3.99  |
| TMEM63A       | ENSMUSG00000026519 | 163.37 | 55.64  | 6.19E-14 | 2.94  |
| Dnajb2        | ENSMUSG00000026203 | 60.19  | 2.32   | 7.49E-14 | 25.96 |
| MYC           | ENSMUSG00000022346 | 71.65  | 6.96   | 8.75E-14 | 10.30 |
| Zfp710        | ENSMUSG00000048897 | 126.11 | 34.78  | 2.03E-13 | 3.63  |
| PPP3CC        | ENSMUSG00000022092 | 192.03 | 76.51  | 2.33E-13 | 2.51  |
| ELOVL6        | ENSMUSG00000041220 | 80.25  | 11.59  | 3.33E-13 | 6.92  |
| Gadd45g       | ENSMUSG00000021453 | 255.08 | 122.88 | 5.19E-13 | 2.08  |
| Cbfa2t3       | ENSMUSG00000006362 | 186.30 | 74.19  | 5.54E-13 | 2.51  |
| Pak6          | ENSMUSG00000074923 | 206.36 | 88.10  | 5.92E-13 | 2.34  |
| SIDT1         | ENSMUSG00000022696 | 171.97 | 64.92  | 6.51E-13 | 2.65  |
| RPL37         | ENSMUSG00000041841 | 114.64 | 30.14  | 8.88E-13 | 3.80  |
| Alad          | ENSMUSG00000028393 | 214.96 | 95.06  | 9.05E-13 | 2.26  |
| TUBA1C        | ENSMUSG00000043091 | 126.11 | 37.09  | 1.17E-12 | 3.40  |
| tiam1         | ENSMUSG00000002489 | 180.57 | 71.87  | 1.26E-12 | 2.51  |
| 2700046G09Rik | ENSMUSG00000024893 | 257.95 | 127.51 | 1.48E-12 | 2.02  |
| ccl1          | ENSMUSG00000020702 | 226.42 | 104.33 | 1.48E-12 | 2.17  |
| ANKRD13B      | ENSMUSG00000037907 | 226.42 | 104.33 | 1.48E-12 | 2.17  |
| Ankrd60       | ENSMUSG00000027517 | 183.43 | 74.19  | 1.53E-12 | 2.47  |
| ikzf2         | ENSMUSG00000025997 | 171.97 | 67.23  | 2.44E-12 | 2.56  |
| Soat2         | ENSMUSG00000023045 | 123.24 | 37.09  | 4.29E-12 | 3.32  |
| Qsox1         | ENSMUSG00000033684 | 123.24 | 37.09  | 4.29E-12 | 3.32  |
| Lypd4         | ENSMUSG00000062732 | 166.24 | 64.92  | 6.00E-12 | 2.56  |
| Spsb2         | ENSMUSG00000038451 | 235.02 | 113.60 | 6.03E-12 | 2.07  |
| TXNRD1        | ENSMUSG00000020250 | 126.11 | 39.41  | 6.62E-12 | 3.20  |

|               |                    |        |        |          |         |
|---------------|--------------------|--------|--------|----------|---------|
| Spin2         | ENSMUSG00000046550 | 151.90 | 55.64  | 6.64E-12 | 2.73    |
| MGAT4B        | ENSMUSG00000036620 | 240.75 | 118.24 | 6.87E-12 | 2.04    |
| IL18RAP       | ENSMUSG00000026068 | 74.52  | 11.59  | 6.93E-12 | 6.43    |
| CCR2          | ENSMUSG00000049103 | 106.05 | 27.82  | 7.08E-12 | 3.81    |
| JUP           | ENSMUSG00000001552 | 217.83 | 102.01 | 9.22E-12 | 2.14    |
| ICAM1         | ENSMUSG00000037405 | 68.79  | 9.27   | 9.26E-12 | 7.42    |
| 2310014H01Rik | ENSMUSG00000034595 | 128.98 | 41.73  | 9.48E-12 | 3.09    |
| PIK3R2        | ENSMUSG00000031834 | 63.05  | 6.96   | 1.06E-11 | 9.07    |
| Irig1         | ENSMUSG00000030029 | 157.64 | 60.28  | 1.06E-11 | 2.62    |
| CREG1         | ENSMUSG00000040713 | 100.31 | 25.50  | 1.41E-11 | 3.93    |
| RASL11B       | ENSMUSG00000049907 | 237.89 | 118.24 | 1.64E-11 | 2.01    |
| timp2         | ENSMUSG00000017466 | 111.78 | 32.46  | 1.98E-11 | 3.44    |
| 8030423F21Rik | ENSMUSG00000052295 | 111.78 | 32.46  | 1.98E-11 | 3.44    |
| Id3           | ENSMUSG00000007872 | 214.96 | 102.01 | 2.31E-11 | 2.11    |
| SOCS5         | ENSMUSG00000037104 | 137.57 | 48.69  | 2.57E-11 | 2.83    |
| Gm7586        | ENSMUSG00000059333 | 140.44 | 51.01  | 3.48E-11 | 2.75    |
| Zfp13         | ENSMUSG00000062012 | 65.92  | 9.27   | 4.26E-11 | 7.11    |
| CDC7          | ENSMUSG00000029283 | 128.98 | 44.05  | 4.41E-11 | 2.93    |
| EIF2B3        | ENSMUSG00000028683 | 48.72  | 2.32   | 4.59E-11 | 21.02   |
| ICK           | ENSMUSG00000079454 | 54.46  | 4.64   | 5.14E-11 | 11.74   |
| Rnu1a1        | ENSMUSG00000065905 | 214.96 | 104.33 | 6.28E-11 | 2.06    |
| Gm608         | ENSMUSG00000004263 | 214.96 | 104.33 | 6.28E-11 | 2.06    |
| nr4a3         | ENSMUSG00000028341 | 220.69 | 108.97 | 7.38E-11 | 2.03    |
| PPEF2         | ENSMUSG00000029410 | 134.71 | 48.69  | 8.08E-11 | 2.77    |
| Lcn4          | ENSMUSG00000026919 | 45.86  | 0.00   | 9.39E-11 | #DIV/0! |
| UNC13A        | ENSMUSG00000034799 | 171.97 | 74.19  | 9.49E-11 | 2.32    |
| crip1         | ENSMUSG00000006360 | 171.97 | 74.19  | 9.49E-11 | 2.32    |
| foxo1         | ENSMUSG00000044167 | 123.24 | 41.73  | 9.78E-11 | 2.95    |
| ALDH3A1       | ENSMUSG00000019102 | 174.83 | 76.51  | 1.10E-10 | 2.29    |
| Snx18         | ENSMUSG00000042364 | 140.44 | 53.32  | 1.34E-10 | 2.63    |
| PRKAR1A       | ENSMUSG00000020612 | 140.44 | 53.32  | 1.34E-10 | 2.63    |
| Csf2          | ENSMUSG00000018916 | 126.11 | 44.05  | 1.36E-10 | 2.86    |
| CSGALNACT1    | ENSMUSG00000036356 | 180.57 | 81.14  | 1.45E-10 | 2.23    |
| irf6          | ENSMUSG00000026638 | 186.30 | 85.78  | 1.85E-10 | 2.17    |
| RBM33         | ENSMUSG00000048271 | 63.05  | 9.27   | 1.88E-10 | 6.80    |
| LIMS1         | ENSMUSG00000019920 | 63.05  | 9.27   | 1.88E-10 | 6.80    |
| Hist1h2bl     | ENSMUSG00000069268 | 94.58  | 25.50  | 1.91E-10 | 3.71    |
| GPR97         | ENSMUSG00000060470 | 94.58  | 25.50  | 1.91E-10 | 3.71    |
| ttk           | ENSMUSG00000038379 | 77.39  | 16.23  | 1.94E-10 | 4.77    |
| LOC100047863  | ENSMUSG00000042594 | 77.39  | 16.23  | 1.94E-10 | 4.77    |
| ETV6          | ENSMUSG00000030199 | 77.39  | 16.23  | 1.94E-10 | 4.77    |
| DHDDS         | ENSMUSG00000012117 | 77.39  | 16.23  | 1.94E-10 | 4.77    |
| C130039O16Rik | ENSMUSG00000042507 | 131.84 | 48.69  | 2.34E-10 | 2.71    |

|               |                    |        |       |          |         |
|---------------|--------------------|--------|-------|----------|---------|
| LOC100047868  | ENSMUSG00000051510 | 194.90 | 92.74 | 2.43E-10 | 2.10    |
| Lars2         | ENSMUSG00000035202 | 134.71 | 51.01 | 3.04E-10 | 2.64    |
| Hist1h2an     | ENSMUSG00000071478 | 97.45  | 27.82 | 3.16E-10 | 3.50    |
| IGSF8         | ENSMUSG00000038034 | 71.65  | 13.91 | 3.38E-10 | 5.15    |
| A330017A19Rik | ENSMUSG00000073388 | 88.85  | 23.18 | 3.93E-10 | 3.83    |
| INSL6         | ENSMUSG00000050957 | 111.78 | 37.09 | 5.05E-10 | 3.01    |
| Angel1        | ENSMUSG00000021257 | 100.31 | 30.14 | 5.11E-10 | 3.33    |
| hbs1l         | ENSMUSG00000019977 | 65.92  | 11.59 | 5.60E-10 | 5.69    |
| NEIL2         | ENSMUSG00000035121 | 166.24 | 74.19 | 6.80E-10 | 2.24    |
| GGTA1         | ENSMUSG00000035778 | 91.72  | 25.50 | 6.92E-10 | 3.60    |
| ST3GAL2       | ENSMUSG00000031749 | 197.76 | 97.37 | 7.28E-10 | 2.03    |
| 2900041M22Rik | ENSMUSG00000054418 | 197.76 | 97.37 | 7.28E-10 | 2.03    |
| Atp5d         | ENSMUSG0000003072  | 103.18 | 32.46 | 7.84E-10 | 3.18    |
| KCNA10        | ENSMUSG00000042861 | 151.90 | 64.92 | 1.03E-09 | 2.34    |
| CLNS1A        | ENSMUSG00000025439 | 54.46  | 6.96  | 1.11E-09 | 7.83    |
| Pim1          | ENSMUSG00000024014 | 134.71 | 53.32 | 1.15E-09 | 2.53    |
| F730048M01Rik | ENSMUSG00000073546 | 134.71 | 53.32 | 1.15E-09 | 2.53    |
| Dmrtdc2       | ENSMUSG00000011349 | 154.77 | 67.23 | 1.20E-09 | 2.30    |
| IMMT          | ENSMUSG00000052337 | 48.72  | 4.64  | 1.20E-09 | 10.51   |
| ELMO2         | ENSMUSG00000017670 | 48.72  | 4.64  | 1.20E-09 | 10.51   |
| Zfp467        | ENSMUSG00000068551 | 183.43 | 88.10 | 1.28E-09 | 2.08    |
| Adat3         | ENSMUSG00000035370 | 40.13  | 0.00  | 1.39E-09 | #DIV/0! |
| LOC100044760  | ENSMUSG00000030201 | 137.57 | 55.64 | 1.39E-09 | 2.47    |
| dock10        | ENSMUSG00000038608 | 68.79  | 13.91 | 1.41E-09 | 4.94    |
| NBEAL2        | ENSMUSG00000056724 | 85.98  | 23.18 | 1.44E-09 | 3.71    |
| Kbtbd11       | ENSMUSG00000055675 | 97.45  | 30.14 | 1.74E-09 | 3.23    |
| D18Erttd653e  | ENSMUSG00000024544 | 97.45  | 30.14 | 1.74E-09 | 3.23    |
| ANGPT2        | ENSMUSG00000031465 | 126.11 | 48.69 | 2.13E-09 | 2.59    |
| Ccdc116       | ENSMUSG00000022768 | 111.78 | 39.41 | 2.23E-09 | 2.84    |
| Gm6091        | ENSMUSG00000025574 | 169.10 | 78.83 | 2.24E-09 | 2.15    |
| AFMID         | ENSMUSG00000017718 | 169.10 | 78.83 | 2.24E-09 | 2.15    |
| Olfr1287      | ENSMUSG00000063377 | 63.05  | 11.59 | 2.41E-09 | 5.44    |
| RALGAPA2      | ENSMUSG00000037110 | 100.31 | 32.46 | 2.60E-09 | 3.09    |
| Card6         | ENSMUSG00000041849 | 100.31 | 32.46 | 2.60E-09 | 3.09    |
| LOC674944     | ENSMUSG00000053716 | 80.25  | 20.87 | 3.05E-09 | 3.85    |
| LOC100045522  | ENSMUSG00000018363 | 80.25  | 20.87 | 3.05E-09 | 3.85    |
| Rabgap1l      | ENSMUSG00000026721 | 180.57 | 88.10 | 3.24E-09 | 2.05    |
| ORC6L         | ENSMUSG00000031697 | 57.32  | 9.27  | 3.78E-09 | 6.18    |
| Mbnl1         | ENSMUSG00000027763 | 57.32  | 9.27  | 3.78E-09 | 6.18    |
| HYAL3         | ENSMUSG00000036091 | 51.59  | 6.96  | 5.19E-09 | 7.42    |
| TTR           | ENSMUSG00000061808 | 40.13  | 2.32  | 5.30E-09 | 17.31   |
| Hexim1        | ENSMUSG00000048878 | 83.12  | 23.18 | 5.30E-09 | 3.59    |
| LOC671929     | ENSMUSG00000074034 | 65.92  | 13.91 | 5.84E-09 | 4.74    |

|               |                    |        |       |          |         |
|---------------|--------------------|--------|-------|----------|---------|
| Gm14217       | ENSMUSG00000058558 | 65.92  | 13.91 | 5.84E-09 | 4.74    |
| SLC12A7       | ENSMUSG00000017756 | 143.31 | 62.60 | 6.45E-09 | 2.29    |
| mpzl3         | ENSMUSG00000070305 | 143.31 | 62.60 | 6.45E-09 | 2.29    |
| Tgfb3         | ENSMUSG00000029287 | 149.04 | 67.23 | 8.48E-09 | 2.22    |
| neurl3        | ENSMUSG00000047180 | 111.78 | 41.73 | 9.08E-09 | 2.68    |
| SPATC1        | ENSMUSG00000049653 | 128.98 | 53.32 | 9.22E-09 | 2.42    |
| Klre1         | ENSMUSG00000050241 | 151.90 | 69.55 | 9.53E-09 | 2.18    |
| SESN2         | ENSMUSG00000028893 | 154.77 | 71.87 | 1.07E-08 | 2.15    |
| SUN2          | ENSMUSG00000042524 | 77.39  | 20.87 | 1.13E-08 | 3.71    |
| Gm13981       | ENSMUSG00000061488 | 114.64 | 44.05 | 1.18E-08 | 2.60    |
| PTPN12        | ENSMUSG00000028771 | 100.31 | 34.78 | 1.20E-08 | 2.88    |
| PCBP4         | ENSMUSG00000023495 | 160.50 | 76.51 | 1.33E-08 | 2.10    |
| tollip        | ENSMUSG00000025139 | 137.57 | 60.28 | 1.55E-08 | 2.28    |
| Rassf3        | ENSMUSG00000025795 | 137.57 | 60.28 | 1.55E-08 | 2.28    |
| usp25         | ENSMUSG00000022867 | 54.46  | 9.27  | 1.70E-08 | 5.87    |
| Gm12416       | ENSMUSG00000057666 | 54.46  | 9.27  | 1.70E-08 | 5.87    |
| SPATA2L       | ENSMUSG00000033594 | 80.25  | 23.18 | 1.94E-08 | 3.46    |
| SETBP1        | ENSMUSG00000024548 | 91.72  | 30.14 | 2.01E-08 | 3.04    |
| 4930546C10Rik | ENSMUSG00000024546 | 91.72  | 30.14 | 2.01E-08 | 3.04    |
| OSGIN1        | ENSMUSG00000074063 | 143.31 | 64.92 | 2.03E-08 | 2.21    |
| LOC100048122  | ENSMUSG00000020029 | 123.24 | 51.01 | 2.24E-08 | 2.42    |
| slmo2         | ENSMUSG00000016257 | 34.39  | 0.00  | 2.34E-08 | #DIV/0! |
| 1700102P08Rik | ENSMUSG00000032611 | 34.39  | 0.00  | 2.34E-08 | #DIV/0! |
| pgm1          | ENSMUSG00000029171 | 71.65  | 18.55 | 2.39E-08 | 3.86    |
| Hspbap1       | ENSMUSG00000022849 | 71.65  | 18.55 | 2.39E-08 | 3.86    |
| Rab43         | ENSMUSG00000030055 | 63.05  | 13.91 | 2.41E-08 | 4.53    |
| LOC100045239  | ENSMUSG00000028098 | 48.72  | 6.96  | 2.43E-08 | 7.01    |
| KDM3A         | ENSMUSG00000053470 | 149.04 | 69.55 | 2.53E-08 | 2.14    |
| OSBPL11       | ENSMUSG00000022807 | 37.26  | 2.32  | 2.69E-08 | 16.07   |
| sreb2         | ENSMUSG00000022463 | 108.91 | 41.73 | 2.79E-08 | 2.61    |
| GNG2          | ENSMUSG00000043004 | 151.90 | 71.87 | 2.79E-08 | 2.11    |
| RABL3         | ENSMUSG00000022827 | 42.99  | 4.64  | 2.88E-08 | 9.27    |
| Gm7586        | ENSMUSG00000061983 | 42.99  | 4.64  | 2.88E-08 | 9.27    |
| TNIP2         | ENSMUSG00000059866 | 83.12  | 25.50 | 2.98E-08 | 3.26    |
| Galnt6        | ENSMUSG00000037280 | 83.12  | 25.50 | 2.98E-08 | 3.26    |
| CRYBA4        | ENSMUSG00000066975 | 83.12  | 25.50 | 2.98E-08 | 3.26    |
| SLC24A6       | ENSMUSG00000032754 | 128.98 | 55.64 | 3.06E-08 | 2.32    |
| 4933429F08Rik | ENSMUSG00000045094 | 128.98 | 55.64 | 3.06E-08 | 2.32    |
| Vps35         | ENSMUSG00000031696 | 57.32  | 11.59 | 4.36E-08 | 4.94    |
| PLEKHA3       | ENSMUSG00000002733 | 57.32  | 11.59 | 4.36E-08 | 4.94    |
| PABPC1L       | ENSMUSG00000054582 | 57.32  | 11.59 | 4.36E-08 | 4.94    |
| ZSCAN10       | ENSMUSG00000023902 | 65.92  | 16.23 | 4.81E-08 | 4.06    |
| Klra15        | ENSMUSG00000079853 | 65.92  | 16.23 | 4.81E-08 | 4.06    |

|               |                     |        |       |          |       |
|---------------|---------------------|--------|-------|----------|-------|
| 6330416G13Rik | ENSMUSG00000045917  | 65.92  | 16.23 | 4.81E-08 | 4.06  |
| S100A5        | ENSMUSG00000001023  | 117.51 | 48.69 | 5.17E-08 | 2.41  |
| CDYL2         | ENSMUSG000000031758 | 117.51 | 48.69 | 5.17E-08 | 2.41  |
| Fcna          | ENSMUSG000000026938 | 143.31 | 67.23 | 5.79E-08 | 2.13  |
| ANKMY1        | ENSMUSG000000034212 | 120.38 | 51.01 | 6.14E-08 | 2.36  |
| AI661453      | ENSMUSG000000034382 | 120.38 | 51.01 | 6.14E-08 | 2.36  |
| RASA4         | ENSMUSG000000004952 | 146.17 | 69.55 | 6.35E-08 | 2.10  |
| 4930544L04Rik | ENSMUSG000000073803 | 146.17 | 69.55 | 6.35E-08 | 2.10  |
| XCL1          | ENSMUSG000000026573 | 88.85  | 30.14 | 6.35E-08 | 2.95  |
| snap23        | ENSMUSG000000027287 | 88.85  | 30.14 | 6.35E-08 | 2.95  |
| CACNB1        | ENSMUSG000000020882 | 88.85  | 30.14 | 6.35E-08 | 2.95  |
| HMGA1         | ENSMUSG000000046711 | 103.18 | 39.41 | 6.41E-08 | 2.62  |
| ZSCAN12       | ENSMUSG000000036721 | 77.39  | 23.18 | 6.55E-08 | 3.34  |
| Slc4a7        | ENSMUSG000000021733 | 149.04 | 71.87 | 6.88E-08 | 2.07  |
| VDAC1         | ENSMUSG000000020402 | 51.59  | 9.27  | 7.21E-08 | 5.56  |
| LOC100047639  | ENSMUSG000000044581 | 51.59  | 9.27  | 7.21E-08 | 5.56  |
| etfB          | ENSMUSG000000004610 | 51.59  | 9.27  | 7.21E-08 | 5.56  |
| 4930455C21Rik | ENSMUSG000000002846 | 51.59  | 9.27  | 7.21E-08 | 5.56  |
| SAMD3         | ENSMUSG000000051354 | 106.05 | 41.73 | 8.05E-08 | 2.54  |
| CRYBB1        | ENSMUSG000000029343 | 106.05 | 41.73 | 8.05E-08 | 2.54  |
| TAGLN2        | ENSMUSG000000026547 | 154.77 | 76.51 | 8.07E-08 | 2.02  |
| tmem87b       | ENSMUSG000000014353 | 68.79  | 18.55 | 8.58E-08 | 3.71  |
| bcor          | ENSMUSG000000040363 | 91.72  | 32.46 | 8.64E-08 | 2.83  |
| NAP1L5        | ENSMUSG000000055430 | 60.19  | 13.91 | 9.30E-08 | 4.33  |
| Mapk7         | ENSMUSG000000001034 | 60.19  | 13.91 | 9.30E-08 | 4.33  |
| Gm5648        | ENSMUSG000000001228 | 60.19  | 13.91 | 9.30E-08 | 4.33  |
| FOXN1         | ENSMUSG000000002057 | 60.19  | 13.91 | 9.30E-08 | 4.33  |
| ApoI9b        | ENSMUSG000000057346 | 128.98 | 57.96 | 9.32E-08 | 2.23  |
| ATP2B1        | ENSMUSG000000019943 | 108.91 | 44.05 | 9.82E-08 | 2.47  |
| 5730590G19Rik | ENSMUSG000000046591 | 131.84 | 60.28 | 1.06E-07 | 2.19  |
| Rnu6          | ENSMUSG000000065765 | 45.86  | 6.96  | 1.08E-07 | 6.59  |
| POLR3C        | ENSMUSG000000028099 | 45.86  | 6.96  | 1.08E-07 | 6.59  |
| LOC100045924  | ENSMUSG000000029910 | 45.86  | 6.96  | 1.08E-07 | 6.59  |
| Gm13892       | ENSMUSG000000076863 | 45.86  | 6.96  | 1.08E-07 | 6.59  |
| ARID5B        | ENSMUSG000000019947 | 45.86  | 6.96  | 1.08E-07 | 6.59  |
| AP2S1         | ENSMUSG000000008036 | 45.86  | 6.96  | 1.08E-07 | 6.59  |
| 0610007P14Rik | ENSMUSG000000021252 | 45.86  | 6.96  | 1.08E-07 | 6.59  |
| S1PR2         | ENSMUSG000000043895 | 94.58  | 34.78 | 1.15E-07 | 2.72  |
| Fasl          | ENSMUSG000000000817 | 94.58  | 34.78 | 1.15E-07 | 2.72  |
| A430105I19Rik | ENSMUSG000000045838 | 134.71 | 62.60 | 1.18E-07 | 2.15  |
| GPN2          | ENSMUSG000000028848 | 34.39  | 2.32  | 1.31E-07 | 14.83 |
| TRUB1         | ENSMUSG000000025086 | 40.13  | 4.64  | 1.36E-07 | 8.65  |
| CREB1         | ENSMUSG000000025958 | 40.13  | 4.64  | 1.36E-07 | 8.65  |

|               |                    |        |       |          |         |
|---------------|--------------------|--------|-------|----------|---------|
| DIRC2         | ENSMUSG00000022848 | 83.12  | 27.82 | 1.44E-07 | 2.99    |
| Prr7          | ENSMUSG00000034686 | 97.45  | 37.09 | 1.48E-07 | 2.63    |
| KLF3          | ENSMUSG00000029178 | 97.45  | 37.09 | 1.48E-07 | 2.63    |
| CD22          | ENSMUSG00000030577 | 97.45  | 37.09 | 1.48E-07 | 2.63    |
| Trim65        | ENSMUSG00000054517 | 54.46  | 11.59 | 1.76E-07 | 4.70    |
| MALT1         | ENSMUSG00000032688 | 54.46  | 11.59 | 1.76E-07 | 4.70    |
| EXOSC1        | ENSMUSG00000034321 | 54.46  | 11.59 | 1.76E-07 | 4.70    |
| cutC          | ENSMUSG00000025193 | 54.46  | 11.59 | 1.76E-07 | 4.70    |
| COX15         | ENSMUSG00000040018 | 54.46  | 11.59 | 1.76E-07 | 4.70    |
| mfsd5         | ENSMUSG00000045665 | 63.05  | 16.23 | 1.79E-07 | 3.89    |
| P4HA1         | ENSMUSG00000019916 | 149.04 | 74.19 | 1.82E-07 | 2.01    |
| SFXN1         | ENSMUSG00000021474 | 100.31 | 39.41 | 1.87E-07 | 2.55    |
| Rnu6          | ENSMUSG00000065664 | 100.31 | 39.41 | 1.87E-07 | 2.55    |
| CTSB          | ENSMUSG00000021939 | 100.31 | 39.41 | 1.87E-07 | 2.55    |
| XIRP1         | ENSMUSG00000079243 | 123.24 | 55.64 | 2.15E-07 | 2.21    |
| RIPK2         | ENSMUSG00000041135 | 74.52  | 23.18 | 2.21E-07 | 3.21    |
| Anln          | ENSMUSG00000036777 | 74.52  | 23.18 | 2.21E-07 | 3.21    |
| MKL2          | ENSMUSG00000079844 | 88.85  | 32.46 | 2.67E-07 | 2.74    |
| Gpr114        | ENSMUSG00000061577 | 128.98 | 60.28 | 2.72E-07 | 2.14    |
| TPD52         | ENSMUSG00000027506 | 106.05 | 44.05 | 2.76E-07 | 2.41    |
| MAMSTR        | ENSMUSG00000042918 | 106.05 | 44.05 | 2.76E-07 | 2.41    |
| NOXO1         | ENSMUSG00000019320 | 48.72  | 9.27  | 3.05E-07 | 5.25    |
| Igh-2         | ENSMUSG00000076734 | 48.72  | 9.27  | 3.05E-07 | 5.25    |
| ACP2          | ENSMUSG00000002103 | 48.72  | 9.27  | 3.05E-07 | 5.25    |
| 1810062G17Rik | ENSMUSG00000027713 | 48.72  | 9.27  | 3.05E-07 | 5.25    |
| PARP10        | ENSMUSG00000063268 | 65.92  | 18.55 | 3.08E-07 | 3.55    |
| RASA2         | ENSMUSG00000032413 | 77.39  | 25.50 | 3.23E-07 | 3.03    |
| MRS2          | ENSMUSG00000021339 | 77.39  | 25.50 | 3.23E-07 | 3.03    |
| LOC100044121  | ENSMUSG00000060261 | 77.39  | 25.50 | 3.23E-07 | 3.03    |
| Gm4705        | ENSMUSG00000062006 | 77.39  | 25.50 | 3.23E-07 | 3.03    |
| ATP10A        | ENSMUSG00000025324 | 77.39  | 25.50 | 3.23E-07 | 3.03    |
| DIP2B         | ENSMUSG00000023026 | 134.71 | 64.92 | 3.23E-07 | 2.08    |
| WLS           | ENSMUSG00000028173 | 108.91 | 46.37 | 3.23E-07 | 2.35    |
| POMGNT1       | ENSMUSG00000028700 | 57.32  | 13.91 | 3.55E-07 | 4.12    |
| Pldi          | ENSMUSG00000037247 | 57.32  | 13.91 | 3.55E-07 | 4.12    |
| A030009H04Rik | ENSMUSG00000043419 | 111.78 | 48.69 | 3.79E-07 | 2.30    |
| rspry1        | ENSMUSG00000050079 | 28.66  | 0.00  | 3.90E-07 | #DIV/0! |
| fundc1        | ENSMUSG00000025040 | 28.66  | 0.00  | 3.90E-07 | #DIV/0! |
| fam192a       | ENSMUSG00000031774 | 28.66  | 0.00  | 3.90E-07 | #DIV/0! |
| PRSS33        | ENSMUSG00000049620 | 94.58  | 37.09 | 4.35E-07 | 2.55    |
| CUX1          | ENSMUSG00000029705 | 114.64 | 51.01 | 4.40E-07 | 2.25    |
| oaz1          | ENSMUSG00000035242 | 42.99  | 6.96  | 4.79E-07 | 6.18    |
| Map2k5        | ENSMUSG00000058444 | 42.99  | 6.96  | 4.79E-07 | 6.18    |

|               |                    |        |       |          |       |
|---------------|--------------------|--------|-------|----------|-------|
| ABCF2         | ENSMUSG00000028953 | 42.99  | 6.96  | 4.79E-07 | 6.18  |
| chaf1b        | ENSMUSG00000022945 | 68.79  | 20.87 | 4.92E-07 | 3.30  |
| AMBN          | ENSMUSG00000029288 | 120.38 | 55.64 | 5.63E-07 | 2.16  |
| Rnu6          | ENSMUSG00000065121 | 83.12  | 30.14 | 6.18E-07 | 2.76  |
| ppp1r11       | ENSMUSG00000036398 | 83.12  | 30.14 | 6.18E-07 | 2.76  |
| Man1a         | ENSMUSG00000003746 | 83.12  | 30.14 | 6.18E-07 | 2.76  |
| ltgav         | ENSMUSG00000027087 | 83.12  | 30.14 | 6.18E-07 | 2.76  |
| 2610039C10Rik | ENSMUSG00000022978 | 83.12  | 30.14 | 6.18E-07 | 2.76  |
| Rnu6          | ENSMUSG00000065391 | 100.31 | 41.73 | 6.33E-07 | 2.40  |
| RNF123        | ENSMUSG00000041528 | 37.26  | 4.64  | 6.34E-07 | 8.04  |
| Mad2l1bp      | ENSMUSG00000034509 | 37.26  | 4.64  | 6.34E-07 | 8.04  |
| GPSM3         | ENSMUSG00000034786 | 37.26  | 4.64  | 6.34E-07 | 8.04  |
| Ccdc157       | ENSMUSG00000051427 | 37.26  | 4.64  | 6.34E-07 | 8.04  |
| TTC9C         | ENSMUSG00000071660 | 31.53  | 2.32  | 6.35E-07 | 13.60 |
| TPST2         | ENSMUSG00000029344 | 31.53  | 2.32  | 6.35E-07 | 13.60 |
| SFRS11        | ENSMUSG00000055436 | 31.53  | 2.32  | 6.35E-07 | 13.60 |
| LRRRC40       | ENSMUSG00000063052 | 31.53  | 2.32  | 6.35E-07 | 13.60 |
| lat           | ENSMUSG00000030742 | 31.53  | 2.32  | 6.35E-07 | 13.60 |
| HNRNPUL2      | ENSMUSG00000071659 | 31.53  | 2.32  | 6.35E-07 | 13.60 |
| Gbas          | ENSMUSG00000029432 | 31.53  | 2.32  | 6.35E-07 | 13.60 |
| 2510012J08Rik | ENSMUSG00000034889 | 31.53  | 2.32  | 6.35E-07 | 13.60 |
| 1700011J10Rik | ENSMUSG00000063714 | 31.53  | 2.32  | 6.35E-07 | 13.60 |
| Olf1r314      | ENSMUSG00000059504 | 60.19  | 16.23 | 6.39E-07 | 3.71  |
| 5730455P16Rik | ENSMUSG00000057181 | 60.19  | 16.23 | 6.39E-07 | 3.71  |
| HDHD3         | ENSMUSG00000038422 | 126.11 | 60.28 | 6.71E-07 | 2.09  |
| lfrd2         | ENSMUSG00000010048 | 51.59  | 11.59 | 6.78E-07 | 4.45  |
| MYLK3         | ENSMUSG00000031698 | 71.65  | 23.18 | 7.22E-07 | 3.09  |
| Gzmc          | ENSMUSG00000079186 | 128.98 | 62.60 | 7.30E-07 | 2.06  |
| DPH1          | ENSMUSG00000078789 | 128.98 | 62.60 | 7.30E-07 | 2.06  |
| Rasa3         | ENSMUSG00000031453 | 103.18 | 44.05 | 7.45E-07 | 2.34  |
| Oas1h         | ENSMUSG00000001168 | 103.18 | 44.05 | 7.45E-07 | 2.34  |
| Axin2         | ENSMUSG00000000142 | 103.18 | 44.05 | 7.45E-07 | 2.34  |
| VAV3          | ENSMUSG00000033721 | 85.98  | 32.46 | 7.84E-07 | 2.65  |
| Batf          | ENSMUSG00000034266 | 85.98  | 32.46 | 7.84E-07 | 2.65  |
| Zfp185        | ENSMUSG00000031351 | 134.71 | 67.23 | 8.50E-07 | 2.00  |
| BAIAP2        | ENSMUSG00000025372 | 88.85  | 34.78 | 1.00E-06 | 2.55  |
| Zbtb41        | ENSMUSG00000033964 | 74.52  | 25.50 | 1.03E-06 | 2.92  |
| RAB18         | ENSMUSG00000073639 | 74.52  | 25.50 | 1.03E-06 | 2.92  |
| Pglyrp1       | ENSMUSG00000030413 | 63.05  | 18.55 | 1.07E-06 | 3.40  |
| C330018D20Rik | ENSMUSG00000024592 | 63.05  | 18.55 | 1.07E-06 | 3.40  |
| 1700041B01Rik | ENSMUSG00000018006 | 63.05  | 18.55 | 1.07E-06 | 3.40  |
| Frat2         | ENSMUSG00000047604 | 111.78 | 51.01 | 1.13E-06 | 2.19  |
| XPNPEP1       | ENSMUSG00000025027 | 91.72  | 37.09 | 1.24E-06 | 2.47  |

|               |                     |        |       |          |         |
|---------------|---------------------|--------|-------|----------|---------|
| TUSC3         | ENSMUSG00000039530  | 45.86  | 9.27  | 1.25E-06 | 4.94    |
| Oas1c         | ENSMUSG00000001166  | 45.86  | 9.27  | 1.25E-06 | 4.94    |
| Gngt2         | ENSMUSG00000038811  | 45.86  | 9.27  | 1.25E-06 | 4.94    |
| Gm3227        | ENSMUSG000000084512 | 45.86  | 9.27  | 1.25E-06 | 4.94    |
| EIF3A         | ENSMUSG00000024991  | 45.86  | 9.27  | 1.25E-06 | 4.94    |
| SNAI3         | ENSMUSG00000006587  | 114.64 | 53.32 | 1.27E-06 | 2.15    |
| STAT4         | ENSMUSG000000062939 | 54.46  | 13.91 | 1.33E-06 | 3.91    |
| LOC100046934  | ENSMUSG000000036940 | 54.46  | 13.91 | 1.33E-06 | 3.91    |
| INPP4B        | ENSMUSG000000037940 | 54.46  | 13.91 | 1.33E-06 | 3.91    |
| Gm14457       | ENSMUSG000000049672 | 54.46  | 13.91 | 1.33E-06 | 3.91    |
| G3BP2         | ENSMUSG000000029405 | 54.46  | 13.91 | 1.33E-06 | 3.91    |
| FcER2A        | ENSMUSG000000005540 | 54.46  | 13.91 | 1.33E-06 | 3.91    |
| FAM124B       | ENSMUSG000000043230 | 54.46  | 13.91 | 1.33E-06 | 3.91    |
| EHD4          | ENSMUSG000000027293 | 117.51 | 55.64 | 1.39E-06 | 2.11    |
| OLFR750       | ENSMUSG000000035932 | 77.39  | 27.82 | 1.39E-06 | 2.78    |
| NOMO1         | ENSMUSG000000030835 | 77.39  | 27.82 | 1.39E-06 | 2.78    |
| MED7          | ENSMUSG000000020397 | 77.39  | 27.82 | 1.39E-06 | 2.78    |
| CCDC109A      | ENSMUSG000000009647 | 77.39  | 27.82 | 1.39E-06 | 2.78    |
| KLHL22        | ENSMUSG000000022750 | 94.58  | 39.41 | 1.47E-06 | 2.40    |
| SLC46A1       | ENSMUSG000000020829 | 120.38 | 57.96 | 1.53E-06 | 2.08    |
| UBE2E1        | ENSMUSG000000021774 | 65.92  | 20.87 | 1.62E-06 | 3.16    |
| RPH3A         | ENSMUSG000000020847 | 65.92  | 20.87 | 1.62E-06 | 3.16    |
| MYST3         | ENSMUSG000000031540 | 65.92  | 20.87 | 1.62E-06 | 3.16    |
| LOC100043992  | ENSMUSG000000034647 | 25.80  | 0.00  | 1.64E-06 | #DIV/0! |
| 5430411C19Rik | ENSMUSG000000047169 | 25.80  | 0.00  | 1.64E-06 | #DIV/0! |
| RPS6KA1       | ENSMUSG000000003644 | 123.24 | 60.28 | 1.66E-06 | 2.04    |
| KLHL2         | ENSMUSG000000031605 | 123.24 | 60.28 | 1.66E-06 | 2.04    |
| INPP5F        | ENSMUSG000000042105 | 126.11 | 62.60 | 1.78E-06 | 2.01    |
| BATF2         | ENSMUSG000000039699 | 126.11 | 62.60 | 1.78E-06 | 2.01    |
| CXCR1         | ENSMUSG000000048480 | 80.25  | 30.14 | 1.81E-06 | 2.66    |
| BOLA1         | ENSMUSG000000015943 | 80.25  | 30.14 | 1.81E-06 | 2.66    |
| TGOLN1        | ENSMUSG000000056429 | 40.13  | 6.96  | 2.04E-06 | 5.77    |
| TCL1          | ENSMUSG000000041359 | 40.13  | 6.96  | 2.04E-06 | 5.77    |
| SPG11         | ENSMUSG000000033396 | 40.13  | 6.96  | 2.04E-06 | 5.77    |
| RNU6          | ENSMUSG000000064446 | 40.13  | 6.96  | 2.04E-06 | 5.77    |
| PFDN5         | ENSMUSG000000001289 | 40.13  | 6.96  | 2.04E-06 | 5.77    |
| MST1          | ENSMUSG000000032591 | 40.13  | 6.96  | 2.04E-06 | 5.77    |
| ITGB2         | ENSMUSG000000000290 | 40.13  | 6.96  | 2.04E-06 | 5.77    |
| INPP5D        | ENSMUSG000000026288 | 40.13  | 6.96  | 2.04E-06 | 5.77    |
| CELA1         | ENSMUSG000000023031 | 40.13  | 6.96  | 2.04E-06 | 5.77    |
| BIN2          | ENSMUSG000000075411 | 40.13  | 6.96  | 2.04E-06 | 5.77    |
| ALDH1A7       | ENSMUSG000000024747 | 40.13  | 6.96  | 2.04E-06 | 5.77    |
| 4930422I07Rik | ENSMUSG000000032425 | 40.13  | 6.96  | 2.04E-06 | 5.77    |



|               |                    |        |       |          |       |
|---------------|--------------------|--------|-------|----------|-------|
| NAT6          | ENSMUSG00000079334 | 57.32  | 16.23 | 2.28E-06 | 3.53  |
| Mphosph8      | ENSMUSG00000079184 | 57.32  | 16.23 | 2.28E-06 | 3.53  |
| MMP20         | ENSMUSG00000018620 | 57.32  | 16.23 | 2.28E-06 | 3.53  |
| Mettl7a2      | ENSMUSG00000056487 | 57.32  | 16.23 | 2.28E-06 | 3.53  |
| fucA1         | ENSMUSG00000028673 | 57.32  | 16.23 | 2.28E-06 | 3.53  |
| FANCA         | ENSMUSG00000032815 | 83.12  | 32.46 | 2.29E-06 | 2.56  |
| SCRN2         | ENSMUSG00000020877 | 68.79  | 23.18 | 2.32E-06 | 2.97  |
| Tmem194       | ENSMUSG00000040195 | 48.72  | 11.59 | 2.61E-06 | 4.20  |
| Skil          | ENSMUSG00000027660 | 48.72  | 11.59 | 2.61E-06 | 4.20  |
| PLCB2         | ENSMUSG00000040061 | 48.72  | 11.59 | 2.61E-06 | 4.20  |
| NAB2          | ENSMUSG00000025402 | 48.72  | 11.59 | 2.61E-06 | 4.20  |
| LOC100048120  | ENSMUSG00000028998 | 48.72  | 11.59 | 2.61E-06 | 4.20  |
| KLF16         | ENSMUSG00000035397 | 48.72  | 11.59 | 2.61E-06 | 4.20  |
| GABRR2        | ENSMUSG00000023267 | 48.72  | 11.59 | 2.61E-06 | 4.20  |
| AKAP11        | ENSMUSG00000075507 | 48.72  | 11.59 | 2.61E-06 | 4.20  |
| A630089N07Rik | ENSMUSG00000074887 | 48.72  | 11.59 | 2.61E-06 | 4.20  |
| PPIL5         | ENSMUSG00000034883 | 85.98  | 34.78 | 2.80E-06 | 2.47  |
| map2k6        | ENSMUSG00000020623 | 85.98  | 34.78 | 2.80E-06 | 2.47  |
| ttl1          | ENSMUSG00000022442 | 108.91 | 51.01 | 2.82E-06 | 2.14  |
| Olf160        | ENSMUSG00000078078 | 108.91 | 51.01 | 2.82E-06 | 2.14  |
| abhd11        | ENSMUSG00000040532 | 108.91 | 51.01 | 2.82E-06 | 2.14  |
| uck1          | ENSMUSG00000010492 | 34.39  | 4.64  | 2.83E-06 | 7.42  |
| PRR11         | ENSMUSG00000020493 | 34.39  | 4.64  | 2.83E-06 | 7.42  |
| lrrc58        | ENSMUSG00000034158 | 34.39  | 4.64  | 2.83E-06 | 7.42  |
| hdgf          | ENSMUSG00000004897 | 34.39  | 4.64  | 2.83E-06 | 7.42  |
| Gm10250       | ENSMUSG00000068706 | 34.39  | 4.64  | 2.83E-06 | 7.42  |
| ATG16L2       | ENSMUSG00000047767 | 34.39  | 4.64  | 2.83E-06 | 7.42  |
| Adam39        | ENSMUSG00000054033 | 34.39  | 4.64  | 2.83E-06 | 7.42  |
| NKTR          | ENSMUSG00000032525 | 28.66  | 2.32  | 3.00E-06 | 12.36 |
| LOC434624     | ENSMUSG00000050708 | 28.66  | 2.32  | 3.00E-06 | 12.36 |
| Gm9845        | ENSMUSG00000026031 | 28.66  | 2.32  | 3.00E-06 | 12.36 |
| Gm6722        | ENSMUSG00000037894 | 28.66  | 2.32  | 3.00E-06 | 12.36 |
| GIT2          | ENSMUSG00000041890 | 28.66  | 2.32  | 3.00E-06 | 12.36 |
| CHD4          | ENSMUSG00000063870 | 28.66  | 2.32  | 3.00E-06 | 12.36 |
| MYO9A         | ENSMUSG00000074258 | 111.78 | 53.32 | 3.09E-06 | 2.10  |
| LRFN4         | ENSMUSG00000045045 | 111.78 | 53.32 | 3.09E-06 | 2.10  |
| HIST1H3F      | ENSMUSG00000069267 | 111.78 | 53.32 | 3.09E-06 | 2.10  |
| Fbxo46        | ENSMUSG00000050428 | 111.78 | 53.32 | 3.09E-06 | 2.10  |
| Psd4          | ENSMUSG00000026979 | 71.65  | 25.50 | 3.09E-06 | 2.81  |
| MAP3K8        | ENSMUSG00000024235 | 71.65  | 25.50 | 3.09E-06 | 2.81  |
| entpd4        | ENSMUSG00000022066 | 71.65  | 25.50 | 3.09E-06 | 2.81  |
| ANGPTL4       | ENSMUSG00000002289 | 71.65  | 25.50 | 3.09E-06 | 2.81  |
| Slc26a6       | ENSMUSG00000023259 | 60.19  | 18.55 | 3.48E-06 | 3.25  |

|               |                    |        |       |          |         |
|---------------|--------------------|--------|-------|----------|---------|
| Olfr169       | ENSMUSG00000068535 | 60.19  | 18.55 | 3.48E-06 | 3.25    |
| LOC100044444  | ENSMUSG00000054618 | 60.19  | 18.55 | 3.48E-06 | 3.25    |
| Gm9231        | ENSMUSG00000004455 | 60.19  | 18.55 | 3.48E-06 | 3.25    |
| Blm           | ENSMUSG00000030528 | 60.19  | 18.55 | 3.48E-06 | 3.25    |
| GPNMB         | ENSMUSG00000029816 | 117.51 | 57.96 | 3.63E-06 | 2.03    |
| PAFAH1B3      | ENSMUSG00000005447 | 91.72  | 39.41 | 3.90E-06 | 2.33    |
| Slc25a45      | ENSMUSG00000024818 | 51.59  | 13.91 | 4.73E-06 | 3.71    |
| PRMT6         | ENSMUSG00000049300 | 51.59  | 13.91 | 4.73E-06 | 3.71    |
| ermp1         | ENSMUSG00000046324 | 51.59  | 13.91 | 4.73E-06 | 3.71    |
| cubn          | ENSMUSG00000026726 | 51.59  | 13.91 | 4.73E-06 | 3.71    |
| A230072I06Rik | ENSMUSG00000074473 | 51.59  | 13.91 | 4.73E-06 | 3.71    |
| 1110002L01Rik | ENSMUSG00000071456 | 51.59  | 13.91 | 4.73E-06 | 3.71    |
| Vmn2r86       | ENSMUSG00000070601 | 42.99  | 9.27  | 4.84E-06 | 4.64    |
| TTL5          | ENSMUSG00000012609 | 42.99  | 9.27  | 4.84E-06 | 4.64    |
| SNORD22       | ENSMUSG00000065087 | 42.99  | 9.27  | 4.84E-06 | 4.64    |
| Oas1b         | ENSMUSG00000029605 | 42.99  | 9.27  | 4.84E-06 | 4.64    |
| KIF2A         | ENSMUSG00000021693 | 42.99  | 9.27  | 4.84E-06 | 4.64    |
| ERP27         | ENSMUSG00000030219 | 42.99  | 9.27  | 4.84E-06 | 4.64    |
| CSF3          | ENSMUSG00000038067 | 42.99  | 9.27  | 4.84E-06 | 4.64    |
| arsA          | ENSMUSG00000022620 | 42.99  | 9.27  | 4.84E-06 | 4.64    |
| ANXA5         | ENSMUSG00000027712 | 42.99  | 9.27  | 4.84E-06 | 4.64    |
| Amz2          | ENSMUSG00000020610 | 42.99  | 9.27  | 4.84E-06 | 4.64    |
| RAB3IL1       | ENSMUSG00000024663 | 63.05  | 20.87 | 5.15E-06 | 3.02    |
| LOC100046789  | ENSMUSG00000037418 | 63.05  | 20.87 | 5.15E-06 | 3.02    |
| Rnu6          | ENSMUSG00000084456 | 97.45  | 44.05 | 5.15E-06 | 2.21    |
| CCDC38        | ENSMUSG00000036168 | 97.45  | 44.05 | 5.15E-06 | 2.21    |
| tes           | ENSMUSG00000029552 | 77.39  | 30.14 | 5.19E-06 | 2.57    |
| LOC100044874  | ENSMUSG00000061232 | 77.39  | 30.14 | 5.19E-06 | 2.57    |
| 4930538K18Rik | ENSMUSG00000028642 | 77.39  | 30.14 | 5.19E-06 | 2.57    |
| PAPSS2        | ENSMUSG00000024899 | 103.18 | 48.69 | 6.41E-06 | 2.12    |
| Tubb2a        | ENSMUSG00000058672 | 80.25  | 32.46 | 6.42E-06 | 2.47    |
| E130308A19Rik | ENSMUSG00000045071 | 80.25  | 32.46 | 6.42E-06 | 2.47    |
| Atp6v0c-ps2   | ENSMUSG00000024121 | 80.25  | 32.46 | 6.42E-06 | 2.47    |
| arhgap17      | ENSMUSG00000030766 | 80.25  | 32.46 | 6.42E-06 | 2.47    |
| RMND5B        | ENSMUSG00000001054 | 22.93  | 0.00  | 6.95E-06 | #DIV/0! |
| Olfr1288      | ENSMUSG00000044039 | 22.93  | 0.00  | 6.95E-06 | #DIV/0! |
| mecp2         | ENSMUSG00000031393 | 22.93  | 0.00  | 6.95E-06 | #DIV/0! |
| Cd48          | ENSMUSG00000015355 | 22.93  | 0.00  | 6.95E-06 | #DIV/0! |
| ZC3H7B        | ENSMUSG00000022390 | 106.05 | 51.01 | 7.04E-06 | 2.08    |
| Tbcc          | ENSMUSG00000036430 | 65.92  | 23.18 | 7.15E-06 | 2.84    |
| Gse1          | ENSMUSG00000031822 | 65.92  | 23.18 | 7.15E-06 | 2.84    |
| fam107b       | ENSMUSG00000026655 | 65.92  | 23.18 | 7.15E-06 | 2.84    |
| 0610009O20Rik | ENSMUSG00000024442 | 65.92  | 23.18 | 7.15E-06 | 2.84    |

|               |                    |        |       |          |      |
|---------------|--------------------|--------|-------|----------|------|
| FNDC3A        | ENSMUSG00000033487 | 108.91 | 53.32 | 7.67E-06 | 2.04 |
| senp8         | ENSMUSG00000051705 | 83.12  | 34.78 | 7.68E-06 | 2.39 |
| lass2         | ENSMUSG00000015714 | 83.12  | 34.78 | 7.68E-06 | 2.39 |
| SDF4          | ENSMUSG00000029076 | 54.46  | 16.23 | 7.70E-06 | 3.36 |
| Rnu6          | ENSMUSG00000064632 | 54.46  | 16.23 | 7.70E-06 | 3.36 |
| Rnu6          | ENSMUSG00000064443 | 54.46  | 16.23 | 7.70E-06 | 3.36 |
| rad51         | ENSMUSG00000027323 | 54.46  | 16.23 | 7.70E-06 | 3.36 |
| Hhat          | ENSMUSG00000037375 | 54.46  | 16.23 | 7.70E-06 | 3.36 |
| fkbp4         | ENSMUSG00000030357 | 54.46  | 16.23 | 7.70E-06 | 3.36 |
| dazl          | ENSMUSG00000010592 | 54.46  | 16.23 | 7.70E-06 | 3.36 |
| 1810012P15Rik | ENSMUSG00000072640 | 54.46  | 16.23 | 7.70E-06 | 3.36 |
| LOC100047722  | ENSMUSG00000061259 | 37.26  | 6.96  | 8.38E-06 | 5.36 |
| JMJD1C        | ENSMUSG00000037876 | 37.26  | 6.96  | 8.38E-06 | 5.36 |
| ISG20         | ENSMUSG00000039236 | 37.26  | 6.96  | 8.38E-06 | 5.36 |
| GTF2E1        | ENSMUSG00000022828 | 37.26  | 6.96  | 8.38E-06 | 5.36 |
| ftcD          | ENSMUSG00000001155 | 37.26  | 6.96  | 8.38E-06 | 5.36 |
| Fam119a       | ENSMUSG00000025956 | 37.26  | 6.96  | 8.38E-06 | 5.36 |
| DCAF4         | ENSMUSG00000021222 | 37.26  | 6.96  | 8.38E-06 | 5.36 |
| 2310035K24Rik | ENSMUSG00000068264 | 37.26  | 6.96  | 8.38E-06 | 5.36 |
| Zfp94         | ENSMUSG00000074282 | 68.79  | 25.50 | 9.45E-06 | 2.70 |
| ZDHH16        | ENSMUSG00000025157 | 45.86  | 11.59 | 9.61E-06 | 3.96 |
| UBQLN4        | ENSMUSG00000008604 | 45.86  | 11.59 | 9.61E-06 | 3.96 |
| KLF10         | ENSMUSG00000037465 | 45.86  | 11.59 | 9.61E-06 | 3.96 |
| Gm10268       | ENSMUSG00000069392 | 45.86  | 11.59 | 9.61E-06 | 3.96 |
| CSAD          | ENSMUSG00000023044 | 45.86  | 11.59 | 9.61E-06 | 3.96 |
| Cpsf6         | ENSMUSG00000055531 | 45.86  | 11.59 | 9.61E-06 | 3.96 |
| CHST12        | ENSMUSG00000036599 | 45.86  | 11.59 | 9.61E-06 | 3.96 |
| ANKRD26       | ENSMUSG00000007827 | 45.86  | 11.59 | 9.61E-06 | 3.96 |
| Rnu6          | ENSMUSG00000077511 | 88.85  | 39.41 | 1.04E-05 | 2.25 |
| KSR1          | ENSMUSG00000018334 | 88.85  | 39.41 | 1.04E-05 | 2.25 |
| ECSCR         | ENSMUSG00000073599 | 88.85  | 39.41 | 1.04E-05 | 2.25 |
| UAP1          | ENSMUSG00000026670 | 57.32  | 18.55 | 1.16E-05 | 3.09 |
| S1PR4         | ENSMUSG00000044199 | 57.32  | 18.55 | 1.16E-05 | 3.09 |
| IL2           | ENSMUSG00000027720 | 57.32  | 18.55 | 1.16E-05 | 3.09 |
| HYAL2         | ENSMUSG00000010047 | 57.32  | 18.55 | 1.16E-05 | 3.09 |
| A630055G03Rik | ENSMUSG00000037991 | 57.32  | 18.55 | 1.16E-05 | 3.09 |
| 5930416I19Rik | ENSMUSG00000048668 | 57.32  | 18.55 | 1.16E-05 | 3.09 |
| CLYBL         | ENSMUSG00000025545 | 91.72  | 41.73 | 1.18E-05 | 2.20 |
| ACVR1B        | ENSMUSG00000000532 | 91.72  | 41.73 | 1.18E-05 | 2.20 |
| rrp1          | ENSMUSG00000061032 | 71.65  | 27.82 | 1.20E-05 | 2.58 |
| NDST1         | ENSMUSG00000054008 | 71.65  | 27.82 | 1.20E-05 | 2.58 |
| mthfd1        | ENSMUSG00000021048 | 71.65  | 27.82 | 1.20E-05 | 2.58 |
| Vmn1r71       | ENSMUSG00000059206 | 31.53  | 4.64  | 1.25E-05 | 6.80 |

|               |                    |        |       |          |       |
|---------------|--------------------|--------|-------|----------|-------|
| Tob2          | ENSMUSG00000048546 | 31.53  | 4.64  | 1.25E-05 | 6.80  |
| Sf3a1         | ENSMUSG00000002129 | 31.53  | 4.64  | 1.25E-05 | 6.80  |
| scyl1         | ENSMUSG00000024941 | 31.53  | 4.64  | 1.25E-05 | 6.80  |
| phf20         | ENSMUSG00000038116 | 31.53  | 4.64  | 1.25E-05 | 6.80  |
| PHC3          | ENSMUSG00000037652 | 31.53  | 4.64  | 1.25E-05 | 6.80  |
| PDDC1         | ENSMUSG00000051007 | 31.53  | 4.64  | 1.25E-05 | 6.80  |
| Olf125        | ENSMUSG00000050613 | 31.53  | 4.64  | 1.25E-05 | 6.80  |
| Mdk-ps1       | ENSMUSG00000081677 | 31.53  | 4.64  | 1.25E-05 | 6.80  |
| LOC100046877  | ENSMUSG00000042369 | 31.53  | 4.64  | 1.25E-05 | 6.80  |
| junb          | ENSMUSG00000052837 | 31.53  | 4.64  | 1.25E-05 | 6.80  |
| IRF3          | ENSMUSG00000003184 | 31.53  | 4.64  | 1.25E-05 | 6.80  |
| HIST2H2AB     | ENSMUSG00000063689 | 31.53  | 4.64  | 1.25E-05 | 6.80  |
| COMTD1        | ENSMUSG00000021773 | 31.53  | 4.64  | 1.25E-05 | 6.80  |
| CNP           | ENSMUSG00000006782 | 31.53  | 4.64  | 1.25E-05 | 6.80  |
| CDC14A        | ENSMUSG00000033502 | 31.53  | 4.64  | 1.25E-05 | 6.80  |
| Snip2         | ENSMUSG00000011958 | 31.53  | 4.64  | 1.25E-05 | 6.80  |
| ATP1A1        | ENSMUSG00000033161 | 94.58  | 44.05 | 1.30E-05 | 2.15  |
| 4930520004Rik | ENSMUSG00000074039 | 94.58  | 44.05 | 1.30E-05 | 2.15  |
| tspO          | ENSMUSG00000041736 | 25.80  | 2.32  | 1.43E-05 | 11.13 |
| RYN3          | ENSMUSG00000084644 | 25.80  | 2.32  | 1.43E-05 | 11.13 |
| Rnu6          | ENSMUSG00000065306 | 25.80  | 2.32  | 1.43E-05 | 11.13 |
| Ogt           | ENSMUSG00000034160 | 25.80  | 2.32  | 1.43E-05 | 11.13 |
| Gm3227        | ENSMUSG00000065343 | 25.80  | 2.32  | 1.43E-05 | 11.13 |
| Gm1420        | ENSMUSG00000076560 | 25.80  | 2.32  | 1.43E-05 | 11.13 |
| FBXL14        | ENSMUSG00000030019 | 25.80  | 2.32  | 1.43E-05 | 11.13 |
| CSPP1         | ENSMUSG00000056763 | 25.80  | 2.32  | 1.43E-05 | 11.13 |
| TTC28         | ENSMUSG00000033209 | 97.45  | 46.37 | 1.43E-05 | 2.10  |
| RPL36AL       | ENSMUSG00000078175 | 74.52  | 30.14 | 1.45E-05 | 2.47  |
| CSF2RA        | ENSMUSG00000059326 | 74.52  | 30.14 | 1.45E-05 | 2.47  |
| A130022J15Rik | ENSMUSG00000035245 | 74.52  | 30.14 | 1.45E-05 | 2.47  |
| Trim14        | ENSMUSG00000039853 | 100.31 | 48.69 | 1.56E-05 | 2.06  |
| SLC25A35      | ENSMUSG00000018740 | 60.19  | 20.87 | 1.60E-05 | 2.88  |
| Gm3227        | ENSMUSG00000084674 | 60.19  | 20.87 | 1.60E-05 | 2.88  |
| Gm13641       | ENSMUSG00000058640 | 60.19  | 20.87 | 1.60E-05 | 2.88  |
| Cblb          | ENSMUSG00000022637 | 60.19  | 20.87 | 1.60E-05 | 2.88  |
| adk           | ENSMUSG00000039197 | 60.19  | 20.87 | 1.60E-05 | 2.88  |
| usp33         | ENSMUSG00000025437 | 48.72  | 13.91 | 1.62E-05 | 3.50  |
| Tmem115       | ENSMUSG00000010045 | 48.72  | 13.91 | 1.62E-05 | 3.50  |
| sp2           | ENSMUSG00000018678 | 48.72  | 13.91 | 1.62E-05 | 3.50  |
| SLURP1        | ENSMUSG00000022596 | 48.72  | 13.91 | 1.62E-05 | 3.50  |
| RPAP2         | ENSMUSG00000033773 | 48.72  | 13.91 | 1.62E-05 | 3.50  |
| Rnu2          | ENSMUSG00000075806 | 48.72  | 13.91 | 1.62E-05 | 3.50  |
| rabac1        | ENSMUSG00000003380 | 48.72  | 13.91 | 1.62E-05 | 3.50  |

|               |                    |        |       |          |      |
|---------------|--------------------|--------|-------|----------|------|
| OPA3          | ENSMUSG00000052214 | 48.72  | 13.91 | 1.62E-05 | 3.50 |
| Gm8494        | ENSMUSG00000037935 | 48.72  | 13.91 | 1.62E-05 | 3.50 |
| Gm3227        | ENSMUSG00000064694 | 48.72  | 13.91 | 1.62E-05 | 3.50 |
| Gm15501       | ENSMUSG00000047675 | 48.72  | 13.91 | 1.62E-05 | 3.50 |
| C230081A13Rik | ENSMUSG00000074305 | 48.72  | 13.91 | 1.62E-05 | 3.50 |
| BC043934      | ENSMUSG00000056418 | 48.72  | 13.91 | 1.62E-05 | 3.50 |
| B3galt6       | ENSMUSG00000050796 | 48.72  | 13.91 | 1.62E-05 | 3.50 |
| ASXL2         | ENSMUSG00000037486 | 48.72  | 13.91 | 1.62E-05 | 3.50 |
| AFP           | ENSMUSG00000054932 | 48.72  | 13.91 | 1.62E-05 | 3.50 |
| 5730601F06Rik | ENSMUSG00000060510 | 48.72  | 13.91 | 1.62E-05 | 3.50 |
| 2310003H01Rik | ENSMUSG00000025384 | 48.72  | 13.91 | 1.62E-05 | 3.50 |
| SLC23A2       | ENSMUSG00000027340 | 103.18 | 51.01 | 1.67E-05 | 2.02 |
| Tcam1         | ENSMUSG00000020712 | 77.39  | 32.46 | 1.74E-05 | 2.38 |
| Olf1765       | ENSMUSG00000056853 | 77.39  | 32.46 | 1.74E-05 | 2.38 |
| CXCR4         | ENSMUSG00000045382 | 77.39  | 32.46 | 1.74E-05 | 2.38 |
| TFAM          | ENSMUSG00000003923 | 40.13  | 9.27  | 1.84E-05 | 4.33 |
| TBCB          | ENSMUSG00000006095 | 40.13  | 9.27  | 1.84E-05 | 4.33 |
| Sgta          | ENSMUSG00000004937 | 40.13  | 9.27  | 1.84E-05 | 4.33 |
| rnf166        | ENSMUSG00000014470 | 40.13  | 9.27  | 1.84E-05 | 4.33 |
| PNKD          | ENSMUSG00000026179 | 40.13  | 9.27  | 1.84E-05 | 4.33 |
| PHF20L1       | ENSMUSG00000072501 | 40.13  | 9.27  | 1.84E-05 | 4.33 |
| Olf1120       | ENSMUSG00000070853 | 40.13  | 9.27  | 1.84E-05 | 4.33 |
| MLLT11        | ENSMUSG00000053192 | 40.13  | 9.27  | 1.84E-05 | 4.33 |
| LOC100048301  | ENSMUSG00000019738 | 40.13  | 9.27  | 1.84E-05 | 4.33 |
| I7Rn6         | ENSMUSG00000062797 | 40.13  | 9.27  | 1.84E-05 | 4.33 |
| itgb1bp1      | ENSMUSG00000062352 | 40.13  | 9.27  | 1.84E-05 | 4.33 |
| CTU2          | ENSMUSG00000049482 | 40.13  | 9.27  | 1.84E-05 | 4.33 |
| Cstad         | ENSMUSG00000047363 | 40.13  | 9.27  | 1.84E-05 | 4.33 |
| CABP4         | ENSMUSG00000024842 | 40.13  | 9.27  | 1.84E-05 | 4.33 |
| RNMTL1        | ENSMUSG00000038046 | 63.05  | 23.18 | 2.11E-05 | 2.72 |
| GNB1          | ENSMUSG00000029064 | 63.05  | 23.18 | 2.11E-05 | 2.72 |
| Gm13641       | ENSMUSG00000061115 | 63.05  | 23.18 | 2.11E-05 | 2.72 |
| Enc1          | ENSMUSG00000041773 | 63.05  | 23.18 | 2.11E-05 | 2.72 |
| BTBD10        | ENSMUSG00000038187 | 63.05  | 23.18 | 2.11E-05 | 2.72 |
| 4930486L24Rik | ENSMUSG00000050345 | 63.05  | 23.18 | 2.11E-05 | 2.72 |
| 1110028C15Rik | ENSMUSG00000026004 | 63.05  | 23.18 | 2.11E-05 | 2.72 |
| Txn1          | ENSMUSG00000028367 | 83.12  | 37.09 | 2.34E-05 | 2.24 |
| TMCO3         | ENSMUSG00000038497 | 83.12  | 37.09 | 2.34E-05 | 2.24 |
| FBLIM1        | ENSMUSG00000006219 | 83.12  | 37.09 | 2.34E-05 | 2.24 |
| calhm2        | ENSMUSG00000033033 | 83.12  | 37.09 | 2.34E-05 | 2.24 |
| 4930555I21Rik | ENSMUSG00000028801 | 83.12  | 37.09 | 2.34E-05 | 2.24 |
| PTGIR         | ENSMUSG00000043017 | 51.59  | 16.23 | 2.49E-05 | 3.18 |
| meig1         | ENSMUSG00000026650 | 51.59  | 16.23 | 2.49E-05 | 3.18 |

|               |                    |       |       |          |      |
|---------------|--------------------|-------|-------|----------|------|
| GNA11         | ENSMUSG00000034781 | 51.59 | 16.23 | 2.49E-05 | 3.18 |
| GEMIN4        | ENSMUSG00000049396 | 51.59 | 16.23 | 2.49E-05 | 3.18 |
| Dbil5         | ENSMUSG00000038057 | 51.59 | 16.23 | 2.49E-05 | 3.18 |
| clp1          | ENSMUSG00000027079 | 51.59 | 16.23 | 2.49E-05 | 3.18 |
| CEP135        | ENSMUSG00000036403 | 51.59 | 16.23 | 2.49E-05 | 3.18 |
| Als2cr4       | ENSMUSG00000038079 | 51.59 | 16.23 | 2.49E-05 | 3.18 |
| ZNRF3         | ENSMUSG00000041961 | 85.98 | 39.41 | 2.62E-05 | 2.18 |
| Bach2         | ENSMUSG00000040270 | 85.98 | 39.41 | 2.62E-05 | 2.18 |
| appl1         | ENSMUSG00000040760 | 85.98 | 39.41 | 2.62E-05 | 2.18 |
| SLC35B4       | ENSMUSG00000018999 | 65.92 | 25.50 | 2.69E-05 | 2.58 |
| Gm7842        | ENSMUSG00000020988 | 65.92 | 25.50 | 2.69E-05 | 2.58 |
| atp5s         | ENSMUSG00000054894 | 65.92 | 25.50 | 2.69E-05 | 2.58 |
| PDK2          | ENSMUSG00000038967 | 88.85 | 41.73 | 2.94E-05 | 2.13 |
| INPP5A        | ENSMUSG00000025477 | 88.85 | 41.73 | 2.94E-05 | 2.13 |
| Gm12579       | ENSMUSG00000083012 | 88.85 | 41.73 | 2.94E-05 | 2.13 |
| Gm12579       | ENSMUSG00000048910 | 88.85 | 41.73 | 2.94E-05 | 2.13 |
| INTS8         | ENSMUSG00000040738 | 91.72 | 44.05 | 3.25E-05 | 2.08 |
| TCF12         | ENSMUSG00000032228 | 68.79 | 27.82 | 3.38E-05 | 2.47 |
| LOC100046895  | ENSMUSG00000062078 | 68.79 | 27.82 | 3.38E-05 | 2.47 |
| COL6A1        | ENSMUSG00000001119 | 68.79 | 27.82 | 3.38E-05 | 2.47 |
| AGPAT2        | ENSMUSG00000026922 | 68.79 | 27.82 | 3.38E-05 | 2.47 |
| tapt1         | ENSMUSG00000046985 | 34.39 | 6.96  | 3.38E-05 | 4.94 |
| Rnu1a1        | ENSMUSG00000075829 | 34.39 | 6.96  | 3.38E-05 | 4.94 |
| Rnf38         | ENSMUSG00000035696 | 34.39 | 6.96  | 3.38E-05 | 4.94 |
| PRG2          | ENSMUSG00000027073 | 34.39 | 6.96  | 3.38E-05 | 4.94 |
| Podn          | ENSMUSG00000028600 | 34.39 | 6.96  | 3.38E-05 | 4.94 |
| Olf1r549      | ENSMUSG00000073977 | 34.39 | 6.96  | 3.38E-05 | 4.94 |
| Olf1r1103-ps1 | ENSMUSG00000083147 | 34.39 | 6.96  | 3.38E-05 | 4.94 |
| NUDCD2        | ENSMUSG00000020328 | 34.39 | 6.96  | 3.38E-05 | 4.94 |
| JMJD5         | ENSMUSG00000030752 | 34.39 | 6.96  | 3.38E-05 | 4.94 |
| Hist2h2ac     | ENSMUSG00000068855 | 34.39 | 6.96  | 3.38E-05 | 4.94 |
| Crocc         | ENSMUSG00000040860 | 34.39 | 6.96  | 3.38E-05 | 4.94 |
| CCNB2         | ENSMUSG00000032218 | 34.39 | 6.96  | 3.38E-05 | 4.94 |
| Vmn1r218      | ENSMUSG00000060490 | 42.99 | 11.59 | 3.39E-05 | 3.71 |
| Txlnb         | ENSMUSG00000039891 | 42.99 | 11.59 | 3.39E-05 | 3.71 |
| TRIM27        | ENSMUSG00000021326 | 42.99 | 11.59 | 3.39E-05 | 3.71 |
| SLC13A1       | ENSMUSG00000029700 | 42.99 | 11.59 | 3.39E-05 | 3.71 |
| ROBLD3        | ENSMUSG00000028062 | 42.99 | 11.59 | 3.39E-05 | 3.71 |
| rheb          | ENSMUSG00000028945 | 42.99 | 11.59 | 3.39E-05 | 3.71 |
| PUSL1         | ENSMUSG00000051557 | 42.99 | 11.59 | 3.39E-05 | 3.71 |
| Ppp1ca        | ENSMUSG00000040385 | 42.99 | 11.59 | 3.39E-05 | 3.71 |
| nagK          | ENSMUSG00000034744 | 42.99 | 11.59 | 3.39E-05 | 3.71 |
| Mrpl3         | ENSMUSG00000032563 | 42.99 | 11.59 | 3.39E-05 | 3.71 |

|               |                    |       |       |          |      |
|---------------|--------------------|-------|-------|----------|------|
| IRAK2         | ENSMUSG00000060477 | 42.99 | 11.59 | 3.39E-05 | 3.71 |
| Gm10072       | ENSMUSG00000066389 | 42.99 | 11.59 | 3.39E-05 | 3.71 |
| COPS7A        | ENSMUSG00000030127 | 42.99 | 11.59 | 3.39E-05 | 3.71 |
| Cntn1         | ENSMUSG00000055022 | 42.99 | 11.59 | 3.39E-05 | 3.71 |
| CDC42SE1      | ENSMUSG00000046722 | 42.99 | 11.59 | 3.39E-05 | 3.71 |
| ccdc12        | ENSMUSG00000019659 | 42.99 | 11.59 | 3.39E-05 | 3.71 |
| Utp14b        | ENSMUSG00000079470 | 94.58 | 46.37 | 3.45E-05 | 2.04 |
| DGAT1         | ENSMUSG00000022555 | 94.58 | 46.37 | 3.45E-05 | 2.04 |
| ACSL3         | ENSMUSG00000032883 | 94.58 | 46.37 | 3.45E-05 | 2.04 |
| Zfp422        | ENSMUSG00000059878 | 54.46 | 18.55 | 3.56E-05 | 2.94 |
| ZCCHC6        | ENSMUSG00000035248 | 54.46 | 18.55 | 3.56E-05 | 2.94 |
| PPA2          | ENSMUSG00000028013 | 54.46 | 18.55 | 3.56E-05 | 2.94 |
| NENF          | ENSMUSG00000037499 | 54.46 | 18.55 | 3.56E-05 | 2.94 |
| nelf          | ENSMUSG00000006476 | 54.46 | 18.55 | 3.56E-05 | 2.94 |
| myo1f         | ENSMUSG00000024300 | 54.46 | 18.55 | 3.56E-05 | 2.94 |
| mettl5        | ENSMUSG00000051730 | 54.46 | 18.55 | 3.56E-05 | 2.94 |
| H2-D1         | ENSMUSG00000073411 | 54.46 | 18.55 | 3.56E-05 | 2.94 |
| GLMN          | ENSMUSG00000029276 | 54.46 | 18.55 | 3.56E-05 | 2.94 |
| FYTTD1        | ENSMUSG00000022800 | 54.46 | 18.55 | 3.56E-05 | 2.94 |
| 1700021K19Rik | ENSMUSG00000035629 | 54.46 | 18.55 | 3.56E-05 | 2.94 |
| N4BP2L1       | ENSMUSG00000041132 | 71.65 | 30.14 | 3.97E-05 | 2.38 |
| Hivep1        | ENSMUSG00000021366 | 71.65 | 30.14 | 3.97E-05 | 2.38 |
| GSTA4         | ENSMUSG00000032348 | 71.65 | 30.14 | 3.97E-05 | 2.38 |
| AP1M2         | ENSMUSG00000003309 | 71.65 | 30.14 | 3.97E-05 | 2.38 |
| SH2D7         | ENSMUSG00000046460 | 74.52 | 32.46 | 4.68E-05 | 2.30 |
| Rgs10         | ENSMUSG00000030844 | 74.52 | 32.46 | 4.68E-05 | 2.30 |
| psmb2         | ENSMUSG00000028837 | 74.52 | 32.46 | 4.68E-05 | 2.30 |
| CCDC86        | ENSMUSG00000024732 | 74.52 | 32.46 | 4.68E-05 | 2.30 |
| ADRB2         | ENSMUSG00000045730 | 74.52 | 32.46 | 4.68E-05 | 2.30 |
| ULK1          | ENSMUSG00000029512 | 57.32 | 20.87 | 4.85E-05 | 2.75 |
| TMEM222       | ENSMUSG00000028857 | 57.32 | 20.87 | 4.85E-05 | 2.75 |
| Gm7993        | ENSMUSG00000011179 | 57.32 | 20.87 | 4.85E-05 | 2.75 |
| CDKN2C        | ENSMUSG00000028551 | 57.32 | 20.87 | 4.85E-05 | 2.75 |
| 4933413G19Rik | ENSMUSG00000001517 | 57.32 | 20.87 | 4.85E-05 | 2.75 |
| Rsph1         | ENSMUSG00000024033 | 77.39 | 34.78 | 5.35E-05 | 2.23 |
| ptch1         | ENSMUSG00000021466 | 77.39 | 34.78 | 5.35E-05 | 2.23 |
| Gm3227        | ENSMUSG00000084683 | 77.39 | 34.78 | 5.35E-05 | 2.23 |
| Tmem214       | ENSMUSG00000038828 | 28.66 | 4.64  | 5.38E-05 | 6.18 |
| TMEM14C       | ENSMUSG00000021361 | 28.66 | 4.64  | 5.38E-05 | 6.18 |
| SVIL          | ENSMUSG00000024236 | 28.66 | 4.64  | 5.38E-05 | 6.18 |
| Sf1           | ENSMUSG00000024949 | 28.66 | 4.64  | 5.38E-05 | 6.18 |
| Olf1203       | ENSMUSG00000057447 | 28.66 | 4.64  | 5.38E-05 | 6.18 |
| KPNB1         | ENSMUSG00000001440 | 28.66 | 4.64  | 5.38E-05 | 6.18 |

|               |                    |       |       |          |      |
|---------------|--------------------|-------|-------|----------|------|
| lfit2         | ENSMUSG00000045932 | 28.66 | 4.64  | 5.38E-05 | 6.18 |
| hsf1          | ENSMUSG00000022556 | 28.66 | 4.64  | 5.38E-05 | 6.18 |
| Gm9171        | ENSMUSG00000046057 | 28.66 | 4.64  | 5.38E-05 | 6.18 |
| Gm2587        | ENSMUSG00000042688 | 28.66 | 4.64  | 5.38E-05 | 6.18 |
| Gm13216       | ENSMUSG00000082013 | 28.66 | 4.64  | 5.38E-05 | 6.18 |
| Ept1          | ENSMUSG00000075703 | 28.66 | 4.64  | 5.38E-05 | 6.18 |
| Bcl2l12       | ENSMUSG00000003190 | 28.66 | 4.64  | 5.38E-05 | 6.18 |
| BC067068      | ENSMUSG00000036009 | 28.66 | 4.64  | 5.38E-05 | 6.18 |
| AARS          | ENSMUSG00000031960 | 28.66 | 4.64  | 5.38E-05 | 6.18 |
| 9430023L20Rik | ENSMUSG00000037204 | 28.66 | 4.64  | 5.38E-05 | 6.18 |
| 4930590J08Rik | ENSMUSG00000034063 | 28.66 | 4.64  | 5.38E-05 | 6.18 |
| 1500002O20Rik | ENSMUSG00000002210 | 28.66 | 4.64  | 5.38E-05 | 6.18 |
| 1110008F13Rik | ENSMUSG00000027637 | 28.66 | 4.64  | 5.38E-05 | 6.18 |
| zswim4        | ENSMUSG00000035671 | 45.86 | 13.91 | 5.43E-05 | 3.30 |
| Tmem156       | ENSMUSG00000037913 | 45.86 | 13.91 | 5.43E-05 | 3.30 |
| THYN1         | ENSMUSG00000035443 | 45.86 | 13.91 | 5.43E-05 | 3.30 |
| SLTM          | ENSMUSG00000032212 | 45.86 | 13.91 | 5.43E-05 | 3.30 |
| Rpusd3        | ENSMUSG00000051169 | 45.86 | 13.91 | 5.43E-05 | 3.30 |
| Plod3         | ENSMUSG00000004846 | 45.86 | 13.91 | 5.43E-05 | 3.30 |
| Mtap7d1       | ENSMUSG00000028849 | 45.86 | 13.91 | 5.43E-05 | 3.30 |
| Gm8300        | ENSMUSG00000079029 | 45.86 | 13.91 | 5.43E-05 | 3.30 |
| ACAP3         | ENSMUSG00000029033 | 45.86 | 13.91 | 5.43E-05 | 3.30 |
| 1700021P04Rik | ENSMUSG00000024819 | 45.86 | 13.91 | 5.43E-05 | 3.30 |
| LRCH3         | ENSMUSG00000022801 | 80.25 | 37.09 | 5.93E-05 | 2.16 |
| Dtnbp1        | ENSMUSG00000057531 | 80.25 | 37.09 | 5.93E-05 | 2.16 |
| DCUN1D2       | ENSMUSG00000038506 | 80.25 | 37.09 | 5.93E-05 | 2.16 |
| ABCA2         | ENSMUSG00000026944 | 80.25 | 37.09 | 5.93E-05 | 2.16 |
| Prl7b1        | ENSMUSG00000021347 | 60.19 | 23.18 | 6.17E-05 | 2.60 |
| pgpep1        | ENSMUSG00000056204 | 60.19 | 23.18 | 6.17E-05 | 2.60 |
| Gm8849        | ENSMUSG00000024217 | 60.19 | 23.18 | 6.17E-05 | 2.60 |
| Gm5800        | ENSMUSG00000068506 | 60.19 | 23.18 | 6.17E-05 | 2.60 |
| GLOD4         | ENSMUSG00000017286 | 60.19 | 23.18 | 6.17E-05 | 2.60 |
| daglb         | ENSMUSG00000039206 | 60.19 | 23.18 | 6.17E-05 | 2.60 |
| Rreb1         | ENSMUSG00000039087 | 83.12 | 39.41 | 6.60E-05 | 2.11 |
| Ptpn9         | ENSMUSG00000032290 | 83.12 | 39.41 | 6.60E-05 | 2.11 |
| Gm7075        | ENSMUSG00000048185 | 83.12 | 39.41 | 6.60E-05 | 2.11 |
| 1700101E01Rik | ENSMUSG00000079502 | 83.12 | 39.41 | 6.60E-05 | 2.11 |
| Zfp563        | ENSMUSG00000067424 | 22.93 | 2.32  | 6.66E-05 | 9.89 |
| Ugt2b38       | ENSMUSG00000061906 | 22.93 | 2.32  | 6.66E-05 | 9.89 |
| ubfd1         | ENSMUSG00000030870 | 22.93 | 2.32  | 6.66E-05 | 9.89 |
| SNX12         | ENSMUSG00000046032 | 22.93 | 2.32  | 6.66E-05 | 9.89 |
| Rnu1a1        | ENSMUSG00000064580 | 22.93 | 2.32  | 6.66E-05 | 9.89 |
| PLP1          | ENSMUSG00000031425 | 22.93 | 2.32  | 6.66E-05 | 9.89 |



|               |                     |       |       |          |      |
|---------------|---------------------|-------|-------|----------|------|
| PARP2         | ENSMUSG00000036023  | 22.93 | 2.32  | 6.66E-05 | 9.89 |
| nudt19        | ENSMUSG00000034875  | 22.93 | 2.32  | 6.66E-05 | 9.89 |
| NMT1          | ENSMUSG00000020936  | 22.93 | 2.32  | 6.66E-05 | 9.89 |
| NADSYN1       | ENSMUSG00000031090  | 22.93 | 2.32  | 6.66E-05 | 9.89 |
| HDAC4         | ENSMUSG00000073617  | 22.93 | 2.32  | 6.66E-05 | 9.89 |
| Gsbs          | ENSMUSG00000002930  | 22.93 | 2.32  | 6.66E-05 | 9.89 |
| Gm12230       | ENSMUSG000000082180 | 22.93 | 2.32  | 6.66E-05 | 9.89 |
| Ears2         | ENSMUSG00000030871  | 22.93 | 2.32  | 6.66E-05 | 9.89 |
| Cyp2c29       | ENSMUSG00000003053  | 22.93 | 2.32  | 6.66E-05 | 9.89 |
| Cops5         | ENSMUSG00000025917  | 22.93 | 2.32  | 6.66E-05 | 9.89 |
| Clec2d        | ENSMUSG00000030157  | 22.93 | 2.32  | 6.66E-05 | 9.89 |
| Atp11b        | ENSMUSG000000037400 | 22.93 | 2.32  | 6.66E-05 | 9.89 |
| 9430008C03Rik | ENSMUSG00000065362  | 22.93 | 2.32  | 6.66E-05 | 9.89 |
| 4930595D18Rik | ENSMUSG000000083193 | 22.93 | 2.32  | 6.66E-05 | 9.89 |
| Zfp566        | ENSMUSG00000078768  | 37.26 | 9.27  | 6.79E-05 | 4.02 |
| Trpv6         | ENSMUSG00000029868  | 37.26 | 9.27  | 6.79E-05 | 4.02 |
| TMPRSS7       | ENSMUSG000000033177 | 37.26 | 9.27  | 6.79E-05 | 4.02 |
| QARS          | ENSMUSG000000032604 | 37.26 | 9.27  | 6.79E-05 | 4.02 |
| Pdcd1         | ENSMUSG000000026285 | 37.26 | 9.27  | 6.79E-05 | 4.02 |
| Olf1375-ps1   | ENSMUSG000000057890 | 37.26 | 9.27  | 6.79E-05 | 4.02 |
| LOC640204     | ENSMUSG000000029430 | 37.26 | 9.27  | 6.79E-05 | 4.02 |
| LOC100041496  | ENSMUSG000000068940 | 37.26 | 9.27  | 6.79E-05 | 4.02 |
| hltf          | ENSMUSG000000002428 | 37.26 | 9.27  | 6.79E-05 | 4.02 |
| Gm5109        | ENSMUSG000000000708 | 37.26 | 9.27  | 6.79E-05 | 4.02 |
| Gm13666       | ENSMUSG000000083569 | 37.26 | 9.27  | 6.79E-05 | 4.02 |
| FAM189B       | ENSMUSG000000032657 | 37.26 | 9.27  | 6.79E-05 | 4.02 |
| EIF4E2        | ENSMUSG000000026254 | 37.26 | 9.27  | 6.79E-05 | 4.02 |
| CPSF3         | ENSMUSG000000054309 | 37.26 | 9.27  | 6.79E-05 | 4.02 |
| Clca3         | ENSMUSG000000028255 | 37.26 | 9.27  | 6.79E-05 | 4.02 |
| AAMP          | ENSMUSG000000006299 | 37.26 | 9.27  | 6.79E-05 | 4.02 |
| 2310067B10Rik | ENSMUSG000000020747 | 37.26 | 9.27  | 6.79E-05 | 4.02 |
| IL1RL1        | ENSMUSG000000026069 | 85.98 | 41.73 | 7.08E-05 | 2.06 |
| Gm4949        | ENSMUSG000000026473 | 85.98 | 41.73 | 7.08E-05 | 2.06 |
| atad2b        | ENSMUSG000000052812 | 85.98 | 41.73 | 7.08E-05 | 2.06 |
| TRABD         | ENSMUSG000000015363 | 63.05 | 25.50 | 7.49E-05 | 2.47 |
| TMEM5         | ENSMUSG000000034620 | 63.05 | 25.50 | 7.49E-05 | 2.47 |
| rel           | ENSMUSG000000020275 | 63.05 | 25.50 | 7.49E-05 | 2.47 |
| RAB3IP        | ENSMUSG000000064181 | 63.05 | 25.50 | 7.49E-05 | 2.47 |
| PCGF6         | ENSMUSG000000025050 | 63.05 | 25.50 | 7.49E-05 | 2.47 |
| FBXO4         | ENSMUSG000000022184 | 88.85 | 44.05 | 7.59E-05 | 2.02 |
| DEPDC1B       | ENSMUSG000000021697 | 88.85 | 44.05 | 7.59E-05 | 2.02 |
| 4921528I07Rik | ENSMUSG000000064299 | 88.85 | 44.05 | 7.59E-05 | 2.02 |
| Zfp850        | ENSMUSG000000074608 | 48.72 | 16.23 | 7.84E-05 | 3.00 |

|               |                    |       |       |          |      |
|---------------|--------------------|-------|-------|----------|------|
| Tssc4         | ENSMUSG00000045752 | 48.72 | 16.23 | 7.84E-05 | 3.00 |
| Tmem11        | ENSMUSG00000043284 | 48.72 | 16.23 | 7.84E-05 | 3.00 |
| taf15         | ENSMUSG00000020680 | 48.72 | 16.23 | 7.84E-05 | 3.00 |
| RPL37A        | ENSMUSG00000046330 | 48.72 | 16.23 | 7.84E-05 | 3.00 |
| Rnu6          | ENSMUSG00000077582 | 48.72 | 16.23 | 7.84E-05 | 3.00 |
| PRPSAP2       | ENSMUSG00000020528 | 48.72 | 16.23 | 7.84E-05 | 3.00 |
| Phf1          | ENSMUSG00000024193 | 48.72 | 16.23 | 7.84E-05 | 3.00 |
| Ogfr          | ENSMUSG00000049401 | 48.72 | 16.23 | 7.84E-05 | 3.00 |
| Nat10         | ENSMUSG00000027185 | 48.72 | 16.23 | 7.84E-05 | 3.00 |
| LRRCS6        | ENSMUSG00000038637 | 48.72 | 16.23 | 7.84E-05 | 3.00 |
| GRPEL1        | ENSMUSG00000029198 | 48.72 | 16.23 | 7.84E-05 | 3.00 |
| Gm6272        | ENSMUSG00000058737 | 48.72 | 16.23 | 7.84E-05 | 3.00 |
| Gm6272        | ENSMUSG00000082524 | 48.72 | 16.23 | 7.84E-05 | 3.00 |
| EXOC7         | ENSMUSG00000020792 | 48.72 | 16.23 | 7.84E-05 | 3.00 |
| E130303B06Rik | ENSMUSG00000013155 | 48.72 | 16.23 | 7.84E-05 | 3.00 |
| CCDC74A       | ENSMUSG00000041617 | 48.72 | 16.23 | 7.84E-05 | 3.00 |
| CCDC111       | ENSMUSG00000038225 | 48.72 | 16.23 | 7.84E-05 | 3.00 |
| Casp3         | ENSMUSG00000031628 | 48.72 | 16.23 | 7.84E-05 | 3.00 |
| BC032203      | ENSMUSG00000036568 | 48.72 | 16.23 | 7.84E-05 | 3.00 |
| ARF4          | ENSMUSG00000021877 | 48.72 | 16.23 | 7.84E-05 | 3.00 |
| 4933405L10Rik | ENSMUSG00000013158 | 48.72 | 16.23 | 7.84E-05 | 3.00 |
| 1700019L03Rik | ENSMUSG00000038987 | 48.72 | 16.23 | 7.84E-05 | 3.00 |
| secisbp2l     | ENSMUSG00000035093 | 65.92 | 27.82 | 8.89E-05 | 2.37 |
| OLFML1        | ENSMUSG00000051041 | 65.92 | 27.82 | 8.89E-05 | 2.37 |
| ITPR2         | ENSMUSG00000030287 | 65.92 | 27.82 | 8.89E-05 | 2.37 |
| ECE2          | ENSMUSG00000022842 | 65.92 | 27.82 | 8.89E-05 | 2.37 |
| D930049A15Rik | ENSMUSG00000007817 | 65.92 | 27.82 | 8.89E-05 | 2.37 |

**Supplementary Table 1b. H3K27 methylation downregulation in *Jmjd3* cKO CD4 T cells**

| Gene.Symbol   | Ensembl.ID         | KO     | WT     | Adj.Pvalue | KO/WT |
|---------------|--------------------|--------|--------|------------|-------|
| Arhgef7       | ENSMUSG00000031511 | 249.35 | 554.10 | 5.67E-18   | 0.45  |
| B830017H08Rik | ENSMUSG00000053571 | 246.49 | 549.47 | 5.74E-18   | 0.45  |
| irx2          | ENSMUSG00000001504 | 180.57 | 435.86 | 4.64E-17   | 0.41  |
| EMB           | ENSMUSG00000021728 | 17.20  | 125.19 | 9.78E-17   | 0.14  |
| KLHL29        | ENSMUSG00000020627 | 140.44 | 359.36 | 8.04E-16   | 0.39  |
| PLEKHG1       | ENSMUSG00000040624 | 229.29 | 496.14 | 3.68E-15   | 0.46  |
| htr2c         | ENSMUSG00000041380 | 37.26  | 153.02 | 3.41E-13   | 0.24  |
| PDPN          | ENSMUSG00000028583 | 186.30 | 410.36 | 4.12E-13   | 0.45  |
| ASB4          | ENSMUSG00000042607 | 192.03 | 417.32 | 6.53E-13   | 0.46  |
| Sox19         | ENSMUSG00000076431 | 11.46  | 90.42  | 1.00E-12   | 0.13  |
| SHISA6        | ENSMUSG00000053930 | 120.38 | 296.76 | 3.10E-12   | 0.41  |

|               |                    |        |        |          |      |
|---------------|--------------------|--------|--------|----------|------|
| klf15         | ENSMUSG00000030087 | 203.49 | 417.32 | 3.68E-11 | 0.49 |
| Aard          | ENSMUSG00000068522 | 209.23 | 421.95 | 8.56E-11 | 0.50 |
| FAM84A        | ENSMUSG00000020607 | 140.44 | 312.99 | 1.90E-10 | 0.45 |
| BC067074      | ENSMUSG00000021763 | 2.87   | 51.01  | 9.12E-10 | 0.06 |
| D3Bwg0562e    | ENSMUSG00000044667 | 22.93  | 102.01 | 1.00E-09 | 0.22 |
| Akp3          | ENSMUSG00000036500 | 57.32  | 166.93 | 1.80E-09 | 0.34 |
| Eid2          | ENSMUSG00000046058 | 171.97 | 347.76 | 4.31E-09 | 0.49 |
| Rnu1a1        | ENSMUSG00000065017 | 11.46  | 69.55  | 1.33E-08 | 0.16 |
| Gm9504        | ENSMUSG00000035171 | 28.66  | 106.65 | 1.64E-08 | 0.27 |
| KLHDC9        | ENSMUSG00000045259 | 37.26  | 122.88 | 1.96E-08 | 0.30 |
| 2310021H06Rik | ENSMUSG00000027484 | 14.33  | 74.19  | 3.39E-08 | 0.19 |
| NEGR1         | ENSMUSG00000040037 | 106.05 | 236.48 | 4.48E-08 | 0.45 |
| Gk2           | ENSMUSG00000050553 | 2.87   | 41.73  | 9.31E-08 | 0.07 |
| Rnu1a1        | ENSMUSG00000064447 | 17.20  | 76.51  | 1.79E-07 | 0.22 |
| Agrp          | ENSMUSG00000005705 | 5.73   | 48.69  | 1.97E-07 | 0.12 |
| FGFBP1        | ENSMUSG00000048373 | 5.73   | 48.69  | 1.97E-07 | 0.12 |
| IFNGR2        | ENSMUSG00000022965 | 22.93  | 88.10  | 2.08E-07 | 0.26 |
| Rnu1a1        | ENSMUSG00000064817 | 45.86  | 129.83 | 3.17E-07 | 0.35 |
| 6720489N17Rik | ENSMUSG00000072066 | 0.00   | 32.46  | 3.22E-07 | 0.00 |
| Ndor1         | ENSMUSG00000006471 | 5.73   | 46.37  | 5.87E-07 | 0.12 |
| TMEM203       | ENSMUSG00000078201 | 5.73   | 46.37  | 5.87E-07 | 0.12 |
| Gm3227        | ENSMUSG00000084640 | 34.39  | 106.65 | 6.96E-07 | 0.32 |
| PAPPA         | ENSMUSG00000028370 | 126.11 | 255.03 | 7.14E-07 | 0.49 |
| Clec2j        | ENSMUSG00000030363 | 0.00   | 30.14  | 9.20E-07 | 0.00 |
| PKIA          | ENSMUSG00000027499 | 100.31 | 213.29 | 1.27E-06 | 0.47 |
| Gpr143        | ENSMUSG00000025333 | 45.86  | 125.19 | 1.27E-06 | 0.37 |
| Gm16517       | ENSMUSG00000020308 | 5.73   | 44.05  | 1.67E-06 | 0.13 |
| obscn         | ENSMUSG00000036935 | 5.73   | 44.05  | 1.67E-06 | 0.13 |
| Serpina5      | ENSMUSG00000041550 | 11.46  | 57.96  | 1.82E-06 | 0.20 |
| BC015286      | ENSMUSG00000050097 | 8.60   | 51.01  | 1.98E-06 | 0.17 |
| Clec9a        | ENSMUSG00000046080 | 34.39  | 102.01 | 3.01E-06 | 0.34 |
| E130309F12Rik | ENSMUSG00000063446 | 74.52  | 169.24 | 3.01E-06 | 0.44 |
| CTNNA1        | ENSMUSG00000038816 | 103.18 | 213.29 | 3.25E-06 | 0.48 |
| ndp           | ENSMUSG00000040138 | 37.26  | 106.65 | 3.47E-06 | 0.35 |
| Nup214        | ENSMUSG00000001855 | 8.60   | 48.69  | 5.19E-06 | 0.18 |
| Olfcr640      | ENSMUSG00000066262 | 8.60   | 48.69  | 5.19E-06 | 0.18 |
| TEKT2         | ENSMUSG00000028845 | 71.65  | 162.29 | 5.40E-06 | 0.44 |
| PCDHB15       | ENSMUSG00000047033 | 0.00   | 25.50  | 7.64E-06 | 0.00 |
| sp1           | ENSMUSG00000001280 | 0.00   | 25.50  | 7.64E-06 | 0.00 |
| LY6G6F        | ENSMUSG00000034923 | 40.13  | 108.97 | 7.77E-06 | 0.37 |
| CYP19A1       | ENSMUSG00000032274 | 2.87   | 32.46  | 8.35E-06 | 0.09 |
| FITM1         | ENSMUSG00000022215 | 2.87   | 32.46  | 8.35E-06 | 0.09 |
| Tex13         | ENSMUSG00000042386 | 2.87   | 32.46  | 8.35E-06 | 0.09 |

|               |                    |       |        |          |      |
|---------------|--------------------|-------|--------|----------|------|
| PLCB1         | ENSMUSG00000051177 | 68.79 | 155.33 | 9.73E-06 | 0.44 |
| LAMA1         | ENSMUSG00000032796 | 91.72 | 190.11 | 1.16E-05 | 0.48 |
| Gm8532        | ENSMUSG00000054702 | 22.93 | 76.51  | 1.20E-05 | 0.30 |
| MPHOSPH9      | ENSMUSG00000038126 | 5.73  | 39.41  | 1.31E-05 | 0.15 |
| NFKBIB        | ENSMUSG00000030595 | 5.73  | 39.41  | 1.31E-05 | 0.15 |
| Sirt2         | ENSMUSG00000015149 | 5.73  | 39.41  | 1.31E-05 | 0.15 |
| USP32         | ENSMUSG00000000804 | 8.60  | 46.37  | 1.36E-05 | 0.19 |
| Gm3080        | ENSMUSG00000029123 | 60.19 | 139.11 | 1.79E-05 | 0.43 |
| Gm11565       | ENSMUSG00000078256 | 20.06 | 69.55  | 1.93E-05 | 0.29 |
| Serpinb1b     | ENSMUSG00000051029 | 20.06 | 69.55  | 1.93E-05 | 0.29 |
| Akr1c12       | ENSMUSG00000021211 | 0.00  | 23.18  | 2.18E-05 | 0.00 |
| FASTK         | ENSMUSG00000028959 | 0.00  | 23.18  | 2.18E-05 | 0.00 |
| 6330409D20Rik | ENSMUSG00000009551 | 2.87  | 30.14  | 2.47E-05 | 0.10 |
| CLDN2         | ENSMUSG00000047230 | 2.87  | 30.14  | 2.47E-05 | 0.10 |
| DPH2          | ENSMUSG00000028540 | 2.87  | 30.14  | 2.47E-05 | 0.10 |
| LOC100044295  | ENSMUSG00000069867 | 2.87  | 30.14  | 2.47E-05 | 0.10 |
| Gm3227        | ENSMUSG00000084582 | 5.73  | 37.09  | 3.59E-05 | 0.15 |
| KBTBD10       | ENSMUSG00000075307 | 5.73  | 37.09  | 3.59E-05 | 0.15 |
| LOC100046250  | ENSMUSG00000076935 | 5.73  | 37.09  | 3.59E-05 | 0.15 |
| Rnu1a1        | ENSMUSG00000065889 | 5.73  | 37.09  | 3.59E-05 | 0.15 |
| LOC639211     | ENSMUSG00000062252 | 71.65 | 153.02 | 4.73E-05 | 0.47 |
| MPP7          | ENSMUSG00000057440 | 65.92 | 143.74 | 5.18E-05 | 0.46 |
| Mybpc2        | ENSMUSG00000038670 | 60.19 | 134.47 | 5.45E-05 | 0.45 |
| PLRG1         | ENSMUSG00000027998 | 60.19 | 134.47 | 5.45E-05 | 0.45 |
| Gm6206        | ENSMUSG00000048949 | 45.86 | 111.28 | 5.72E-05 | 0.41 |
| FAR2          | ENSMUSG00000030303 | 54.46 | 125.19 | 5.72E-05 | 0.43 |
| Nrxn3         | ENSMUSG00000066392 | 0.00  | 20.87  | 6.44E-05 | 0.00 |
| Pdzk1         | ENSMUSG00000038298 | 0.00  | 20.87  | 6.44E-05 | 0.00 |
| ZCCHC12       | ENSMUSG00000036699 | 0.00  | 20.87  | 6.44E-05 | 0.00 |
| BC014805      | ENSMUSG00000053303 | 11.46 | 48.69  | 6.79E-05 | 0.24 |
| KIF3C         | ENSMUSG00000020668 | 11.46 | 48.69  | 6.79E-05 | 0.24 |
| PRG4          | ENSMUSG00000006014 | 11.46 | 48.69  | 6.79E-05 | 0.24 |
| Gm13011       | ENSMUSG00000023433 | 17.20 | 60.28  | 6.80E-05 | 0.29 |
| Tmem39a       | ENSMUSG00000002845 | 17.20 | 60.28  | 6.80E-05 | 0.29 |
| FANK1         | ENSMUSG00000053111 | 77.39 | 159.97 | 6.89E-05 | 0.48 |
| CHRNA6        | ENSMUSG00000031491 | 2.87  | 27.82  | 7.27E-05 | 0.10 |
| Gm5613        | ENSMUSG00000012405 | 2.87  | 27.82  | 7.27E-05 | 0.10 |
| HSD11B1       | ENSMUSG00000016194 | 2.87  | 27.82  | 7.27E-05 | 0.10 |
| mvk           | ENSMUSG00000041939 | 2.87  | 27.82  | 7.27E-05 | 0.10 |
| NKIRAS1       | ENSMUSG00000021772 | 2.87  | 27.82  | 7.27E-05 | 0.10 |
| Olfir799      | ENSMUSG00000057002 | 2.87  | 27.82  | 7.27E-05 | 0.10 |
| Rnu1a1        | ENSMUSG00000065945 | 2.87  | 27.82  | 7.27E-05 | 0.10 |
| RPPH1         | ENSMUSG00000084699 | 2.87  | 27.82  | 7.27E-05 | 0.10 |

|               |                    |       |       |          |      |
|---------------|--------------------|-------|-------|----------|------|
| uqcrfs1       | ENSMUSG00000038462 | 2.87  | 27.82 | 7.27E-05 | 0.10 |
| PROK1         | ENSMUSG00000070368 | 31.53 | 85.78 | 8.25E-05 | 0.37 |
| 0910001L09Rik | ENSMUSG00000050552 | 5.73  | 34.78 | 9.66E-05 | 0.16 |
| 1700061G19Rik | ENSMUSG00000024209 | 5.73  | 34.78 | 9.66E-05 | 0.16 |
| C4bp          | ENSMUSG00000026405 | 5.73  | 34.78 | 9.66E-05 | 0.16 |
| CEP76         | ENSMUSG00000073542 | 5.73  | 34.78 | 9.66E-05 | 0.16 |
| EPST11        | ENSMUSG00000022014 | 5.73  | 34.78 | 9.66E-05 | 0.16 |
| RAD23A        | ENSMUSG00000003813 | 5.73  | 34.78 | 9.66E-05 | 0.16 |

### Supplementary Table 1c. H3K4 methylation upregulation in *Jmjd3* cKO CD4 T cells

| Gene.Symbol   | Ensembl.ID         | KO     | WT     | Adj.Pvalue | KO/WT |
|---------------|--------------------|--------|--------|------------|-------|
| igf2bp3       | ENSMUSG00000029814 | 761.41 | 319.16 | 7.31E-47   | 2.39  |
| LOC545383     | ENSMUSG00000073491 | 520.58 | 173.94 | 8.64E-44   | 2.99  |
| ENG           | ENSMUSG00000026814 | 501.12 | 204.26 | 6.19E-32   | 2.45  |
| cnr1          | ENSMUSG00000044288 | 479.23 | 191.50 | 1.65E-31   | 2.50  |
| OSR2          | ENSMUSG00000022330 | 594.78 | 285.65 | 1.37E-28   | 2.08  |
| Sp9           | ENSMUSG00000068859 | 540.04 | 258.52 | 4.80E-26   | 2.09  |
| Trp73         | ENSMUSG00000029026 | 555.85 | 277.67 | 1.45E-24   | 2.00  |
| pou3f2        | ENSMUSG00000052621 | 272.45 | 89.37  | 4.74E-23   | 3.05  |
| tal1          | ENSMUSG00000028717 | 402.60 | 177.14 | 1.44E-22   | 2.27  |
| fabp3         | ENSMUSG00000028773 | 302.86 | 111.71 | 3.49E-22   | 2.71  |
| NTN5          | ENSMUSG00000070564 | 195.83 | 51.07  | 5.81E-21   | 3.83  |
| Hdac7         | ENSMUSG00000022475 | 389.22 | 191.50 | 1.20E-17   | 2.03  |
| SRGAP1        | ENSMUSG00000020121 | 364.89 | 175.54 | 2.70E-17   | 2.08  |
| PANX2         | ENSMUSG00000058441 | 254.21 | 100.54 | 8.56E-17   | 2.53  |
| DOCK1         | ENSMUSG00000058325 | 122.85 | 30.32  | 9.57E-14   | 4.05  |
| Tmem136       | ENSMUSG00000048503 | 271.24 | 126.07 | 9.67E-14   | 2.15  |
| sfrp2         | ENSMUSG00000027996 | 240.83 | 108.52 | 6.49E-13   | 2.22  |
| Lhx9          | ENSMUSG00000019230 | 162.99 | 57.45  | 1.22E-12   | 2.84  |
| Fndc4         | ENSMUSG00000038552 | 167.85 | 60.64  | 1.30E-12   | 2.77  |
| KHDRBS3       | ENSMUSG00000022332 | 189.74 | 75.00  | 1.38E-12   | 2.53  |
| NFATC4        | ENSMUSG00000023411 | 173.93 | 67.02  | 5.82E-12   | 2.60  |
| Slc5a5        | ENSMUSG00000000792 | 141.09 | 46.28  | 6.12E-12   | 3.05  |
| EFNA5         | ENSMUSG00000048915 | 265.16 | 132.45 | 1.07E-11   | 2.00  |
| ZIC2          | ENSMUSG00000061524 | 238.40 | 113.30 | 1.29E-11   | 2.10  |
| ADAMTSL2      | ENSMUSG00000036040 | 144.74 | 51.07  | 3.16E-11   | 2.83  |
| GUCY1A3       | ENSMUSG00000033910 | 195.83 | 86.17  | 5.57E-11   | 2.27  |
| CD248         | ENSMUSG00000056481 | 130.15 | 44.68  | 1.83E-10   | 2.91  |
| LOC100046128  | ENSMUSG00000020805 | 152.04 | 59.05  | 2.21E-10   | 2.57  |
| FAM163B       | ENSMUSG00000009216 | 170.28 | 73.41  | 6.51E-10   | 2.32  |
| 5730409E04Rik | ENSMUSG00000073755 | 173.93 | 78.19  | 1.97E-09   | 2.22  |

|               |                    |        |        |          |       |
|---------------|--------------------|--------|--------|----------|-------|
| ARHGAP29      | ENSMUSG00000039831 | 206.77 | 102.13 | 2.18E-09 | 2.02  |
| Gckr          | ENSMUSG00000059434 | 136.23 | 52.66  | 2.22E-09 | 2.59  |
| SIM2          | ENSMUSG00000062713 | 138.66 | 55.85  | 5.10E-09 | 2.48  |
| SLC18A2       | ENSMUSG00000025094 | 125.28 | 47.87  | 8.12E-09 | 2.62  |
| rgma          | ENSMUSG00000070509 | 193.39 | 95.75  | 8.60E-09 | 2.02  |
| Gm14085       | ENSMUSG00000079071 | 99.74  | 31.92  | 8.71E-09 | 3.12  |
| tbx15         | ENSMUSG00000027868 | 145.96 | 62.24  | 1.02E-08 | 2.35  |
| ANKRD58       | ENSMUSG00000044400 | 141.09 | 59.05  | 1.09E-08 | 2.39  |
| LOC100047391  | ENSMUSG00000042246 | 138.66 | 57.45  | 1.12E-08 | 2.41  |
| FGF8          | ENSMUSG00000025219 | 159.34 | 71.81  | 1.14E-08 | 2.22  |
| POU3F3        | ENSMUSG00000045515 | 121.63 | 46.28  | 1.24E-08 | 2.63  |
| ZBTB8B        | ENSMUSG00000048485 | 66.90  | 15.96  | 7.67E-08 | 4.19  |
| Kremen2       | ENSMUSG00000040680 | 127.71 | 54.26  | 1.06E-07 | 2.35  |
| Prr19         | ENSMUSG00000058741 | 49.87  | 7.98   | 1.18E-07 | 6.25  |
| lhx6          | ENSMUSG00000026890 | 149.61 | 70.22  | 1.34E-07 | 2.13  |
| mos           | ENSMUSG00000078365 | 108.25 | 43.09  | 2.94E-07 | 2.51  |
| 1810019J16Rik | ENSMUSG00000037600 | 94.87  | 35.11  | 4.60E-07 | 2.70  |
| 9930021D14Rik | ENSMUSG00000045744 | 94.87  | 35.11  | 4.60E-07 | 2.70  |
| PRICKLE4      | ENSMUSG00000079444 | 133.79 | 62.24  | 6.03E-07 | 2.15  |
| CDHR5         | ENSMUSG00000025497 | 38.92  | 4.79   | 8.10E-07 | 8.13  |
| Plekhg4       | ENSMUSG00000014782 | 41.35  | 6.38   | 1.56E-06 | 6.48  |
| DOC2A         | ENSMUSG00000052301 | 119.20 | 54.26  | 1.83E-06 | 2.20  |
| GRHL3         | ENSMUSG00000037188 | 133.79 | 65.43  | 2.40E-06 | 2.04  |
| Wnt1          | ENSMUSG00000022997 | 133.79 | 65.43  | 2.40E-06 | 2.04  |
| 3830431G21Rik | ENSMUSG00000066438 | 80.28  | 28.72  | 2.72E-06 | 2.79  |
| HTRA1         | ENSMUSG00000006205 | 137.44 | 68.62  | 2.91E-06 | 2.00  |
| Olf75         | ENSMUSG00000035932 | 40.14  | 6.38   | 2.91E-06 | 6.29  |
| Syt2          | ENSMUSG00000026452 | 103.39 | 44.68  | 3.69E-06 | 2.31  |
| FAM83A        | ENSMUSG00000051225 | 27.98  | 1.60   | 3.78E-06 | 17.53 |
| MESP1         | ENSMUSG00000030544 | 127.71 | 62.24  | 4.00E-06 | 2.05  |
| 5430405G05Rik | ENSMUSG00000044364 | 107.04 | 47.87  | 4.97E-06 | 2.24  |
| Rag2          | ENSMUSG00000032864 | 117.98 | 55.85  | 5.35E-06 | 2.11  |
| NFATC2        | ENSMUSG00000027544 | 92.44  | 38.30  | 6.39E-06 | 2.41  |
| TMEM141       | ENSMUSG00000026939 | 100.95 | 44.68  | 8.26E-06 | 2.26  |
| IGSF10        | ENSMUSG00000072290 | 107.04 | 49.47  | 1.04E-05 | 2.16  |
| Apof          | ENSMUSG00000047631 | 76.63  | 28.72  | 1.07E-05 | 2.67  |
| nkain4        | ENSMUSG00000027574 | 105.82 | 49.47  | 1.52E-05 | 2.14  |
| 0610009B14Rik | ENSMUSG00000044062 | 75.41  | 28.72  | 1.67E-05 | 2.63  |
| Nrl           | ENSMUSG00000040632 | 42.57  | 9.57   | 2.20E-05 | 4.45  |
| DLG5          | ENSMUSG00000021782 | 86.36  | 36.70  | 2.35E-05 | 2.35  |
| ASB4          | ENSMUSG00000042607 | 79.06  | 31.92  | 2.56E-05 | 2.48  |
| Rbp1          | ENSMUSG00000046402 | 90.01  | 39.90  | 3.23E-05 | 2.26  |
| LY6G6E        | ENSMUSG00000013766 | 58.38  | 19.15  | 3.47E-05 | 3.05  |

|          |                    |        |       |          |      |
|----------|--------------------|--------|-------|----------|------|
| hspb7    | ENSMUSG00000006221 | 27.98  | 3.19  | 3.57E-05 | 8.77 |
| prpH     | ENSMUSG00000023484 | 109.47 | 54.26 | 3.73E-05 | 2.02 |
| Slc16a11 | ENSMUSG00000040938 | 98.52  | 46.28 | 3.74E-05 | 2.13 |
| smagp    | ENSMUSG00000070314 | 65.68  | 23.94 | 3.97E-05 | 2.74 |
| MFAP2    | ENSMUSG00000060572 | 75.41  | 30.32 | 3.99E-05 | 2.49 |
| KRT18    | ENSMUSG00000023043 | 79.06  | 33.51 | 5.80E-05 | 2.36 |
| CHRNE    | ENSMUSG00000014609 | 34.06  | 6.38  | 6.14E-05 | 5.34 |
| L3MBTL   | ENSMUSG00000035576 | 98.52  | 47.87 | 7.36E-05 | 2.06 |
| FBXL16   | ENSMUSG00000025738 | 42.57  | 11.17 | 8.52E-05 | 3.81 |

**Supplementary Table 1d. H3K4 methylation downregulation in *Jmjd3* cKO CD4 T cells**

| Gene.Symbol  | Ensembl.ID         | KO     | WT     | Adj.Pvalue | KO/WT |
|--------------|--------------------|--------|--------|------------|-------|
| Nkg7         | ENSMUSG00000004612 | 47.44  | 311.18 | 1.40E-40   | 0.15  |
| ZBTB16       | ENSMUSG00000066687 | 90.01  | 378.21 | 1.30E-34   | 0.24  |
| LOC100048689 | ENSMUSG00000030325 | 19.46  | 183.52 | 1.39E-28   | 0.11  |
| Tcrg-C       | ENSMUSG00000076757 | 43.79  | 201.07 | 8.78E-20   | 0.22  |
| Fasl         | ENSMUSG00000000817 | 147.17 | 392.57 | 1.21E-19   | 0.37  |
| CXCR3        | ENSMUSG00000050232 | 107.04 | 317.57 | 7.39E-19   | 0.34  |
| ITGA1        | ENSMUSG00000042284 | 51.09  | 202.67 | 2.69E-17   | 0.25  |
| XCL1         | ENSMUSG00000026573 | 53.52  | 207.46 | 2.77E-17   | 0.26  |
| SAMD3        | ENSMUSG00000051354 | 29.19  | 143.62 | 5.93E-15   | 0.20  |
| LOC100048754 | ENSMUSG00000033024 | 6.08   | 81.39  | 3.09E-14   | 0.07  |
| CXCR6        | ENSMUSG00000048521 | 110.68 | 269.69 | 2.06E-11   | 0.41  |
| CD7          | ENSMUSG00000025163 | 145.96 | 322.35 | 4.83E-11   | 0.45  |
| IL4          | ENSMUSG00000000869 | 27.98  | 114.90 | 3.07E-10   | 0.24  |
| FGL2         | ENSMUSG00000039899 | 80.28  | 202.67 | 3.02E-09   | 0.40  |
| S100A6       | ENSMUSG00000001025 | 79.06  | 196.28 | 1.01E-08   | 0.40  |
| KLRK1        | ENSMUSG00000030149 | 18.24  | 81.39  | 6.27E-08   | 0.22  |
| IFNG         | ENSMUSG00000055170 | 59.60  | 154.79 | 1.58E-07   | 0.39  |
| GZMB         | ENSMUSG00000015437 | 10.95  | 60.64  | 4.12E-07   | 0.18  |
| Ctla2b       | ENSMUSG00000074874 | 3.65   | 41.49  | 4.53E-07   | 0.09  |
| PLS3         | ENSMUSG00000016382 | 38.92  | 110.11 | 2.89E-06   | 0.35  |
| Tcrg-V2      | ENSMUSG00000076752 | 25.54  | 84.58  | 4.63E-06   | 0.30  |
| dmrta1       | ENSMUSG00000043753 | 42.57  | 113.30 | 7.34E-06   | 0.38  |
| S100a4       | ENSMUSG00000001020 | 30.41  | 90.96  | 1.09E-05   | 0.33  |
| Tcrg-C       | ENSMUSG00000076755 | 24.33  | 79.79  | 1.12E-05   | 0.30  |
| PLA2G4F      | ENSMUSG00000046971 | 19.46  | 70.22  | 1.24E-05   | 0.28  |
| KLRD1        | ENSMUSG00000030165 | 38.92  | 105.32 | 1.26E-05   | 0.37  |
| PTPN5        | ENSMUSG00000030854 | 29.19  | 87.77  | 1.51E-05   | 0.33  |

## Supplementary Table 2 | List of primers.

### Genotyping Primers

|                   |                               |
|-------------------|-------------------------------|
| <i>Jmjd3</i> -1bF | 5'-TGGACATTCTCTCCTCCCAG-3'    |
| <i>Jmjd3</i> -3aR | 5'-GCGTATTTAGCGATGGTGGT-3'    |
| <i>Jmjd3</i> -4aR | 5'-AGGGTGGGTGTTGAGACAAG-3'    |
| <i>CD4</i> -Cre-F | 5'-GCGGTCTGGCAGTAAAACTATC-3'  |
| <i>CD4</i> -Cre-R | 5'-GTGAAACAGCATTGCTGTCACTT-3' |

### Real-time Primers

|                  |                               |
|------------------|-------------------------------|
| <i>Foxo1</i> -1F | 5'-CTTCAAGGATAAGGGCGACA-3'    |
| <i>Foxo1</i> -1R | 5'-GACAGATTGTGGCGAATTGA-3'    |
| <i>Stat3</i> -1F | 5'-GGAAATAACGGTGAAGGTGCT-3'   |
| <i>Stat3</i> -1R | 5'-CATGTCAAACGTGAGCGACT-3'    |
| <i>Irf4</i> -1F  | 5'-ACAGCACCTTATGGCTCTCTG-3'   |
| <i>Irf4</i> -1R  | 5'-ATGGGGTGGCATCATGTAGT-3'    |
| <i>Maf</i> -1R   | 5'-TTCCTCTCCCGAATTTTCA-3'     |
| <i>Maf</i> -1F   | 5'-CCACGGAGCATTTAACAAGG-3'    |
| <i>Runx1</i> -1F | 5'-CTCCGTGCTACCCACTCACT-3'    |
| <i>Runx1</i> -1R | 5'-ATGACGGTGACCAGAGTGC-3'     |
| <i>Rorc</i> -1F  | 5'-ACCTCTTTTCACGGGAGGA-3'     |
| <i>Rorc</i> -1R  | 5'-TCCCACATCTCCCACATTG-3'     |
| <i>Batf</i> -1F  | 5'-AGAAAGCCGACACCCTTCA-3'     |
| <i>Batf</i> -1R  | 5'-CGGAGAGCTGCGTTCTGT-3'      |
| <i>Foxp3</i> -1F | 5'-TCAGGAGCCCACCAGTACA-3'     |
| <i>Foxp3</i> -1R | 5'-TCTGAAGGCAGAGTCAGGAGA-3'   |
| <i>Tbx21</i> -1F | 5'-TCAACCAGCACCAGACAGAG-3'    |
| <i>Tbx21</i> -1R | 5'-AAACATCCTGTAATGGCTTGTG-3'  |
| <i>Gata3</i> -1F | 5'-TTATCAAGCCCAAGCGAAG-3'     |
| <i>Gata3</i> -1R | 5'-TGGTGGTGGTCTGACAGTTC-3'    |
| <i>Fosl2</i> -1F | 5'-CACGCCGAGTCCTACTCCA-3'     |
| <i>Fosl2</i> -1R | 5'-GTGGGCTGTACCATCCACTG-3'    |
| <i>Eomes</i> -1F | 5'-GCCTACCAAAACACGGATA-3'     |
| <i>Eomes</i> -1R | 5'-TCTGTTGGGGTGAGAGGAG-3'     |
| <i>ACT</i> -1F   | 5'-CCTCTGGTCGTACCACAG-3'      |
| <i>ACT</i> -1R   | 5'-GCCACAGGATTCCATACCC-3'     |
| <i>CD44</i> -1F  | 5'-AGCAGCGGCTCCACCATCGAGA-3'  |
| <i>CD44</i> -1R  | 5'-TCGGATCCATGAGTCACAGTG-3'   |
| <i>CD103</i> -1F | 5'-CCTGTGCAGCATGTAAAAGAATG-3' |
| <i>CD103</i> -1R | 5'-CAAGGATCGGCAGTTCAGATAC-3'  |
| <i>Cxcr1</i> -1F | 5'- TGGGGGTGATCTTTGCTGTT-3'   |
| <i>Cxcr1</i> -1R | 5'-TTTGGCCAACGAAGGCATAG-3'    |
| <i>Cxcr2</i> -1F | 5'-ACCCTCTTTAAGGCCACATG-3'    |
| <i>Cxcr2</i> -1R | 5'-CAAGGACGACAGCGAAGATG-3'    |



|                  |                                 |
|------------------|---------------------------------|
| <i>Cxcr3</i> -2F | 5'-CAGCCTGAACTTTGACAGAACCT-3'   |
| <i>Cxcr3</i> -2R | 5'-GCAGCCCCAGCAAGAAGA-3'        |
| <i>Cxcr4</i> -1F | 5'-TCAGCCTGGACCGGTACCT-3'       |
| <i>Cxcr4</i> -1R | 5'-GCAGTTTCCTTGGCCTTTGA-3'      |
| <i>Cxcr5</i> -1F | 5'-ACTACCCACTAACCCCTGGACA-3'    |
| <i>Cxcr5</i> -1R | 5'-GTAGGGGAATCTCCGTGCTG-3'      |
| <i>Cxcr6</i> -1F | 5'-CTTTCGGGCTTGCCTTAACC-3'      |
| <i>Cxcr6</i> -1R | 5'-CATTGTGGGAGGCAGAACAA-3'      |
| <i>CX3CR1</i> -F | 5'-TCAGCATCGACCGGTACCTT-3'      |
| <i>CX3CR1</i> -R | 5'-CTGCACTGTCCGGTTGTTCA-3'      |
| <i>Ifng</i> -2F  | 5'-ATGAACGCTACACACTGCATC-3'     |
| <i>Ifng</i> -2R  | 5'-CCATCCTTTTGCCAGTTCCTC-3'     |
| <i>Jmjd3</i> -F  | 5'-CCCATCACCGTCATCAGG-3'        |
| <i>Jmjd3</i> -R  | 5'-TTGGTGGAGAAAAGGCCTAA-3'      |
| <i>UTX</i> -F    | 5'-TTGGTGGAGAAAAGGCCTAA-3'      |
| <i>UTX</i> -R    | 5'-GGAGGAAAGAAAGCATCACG-3'      |
| <i>IL-4</i> -F   | 5'-ACAGGAGAAGGGACGCCAT-3'       |
| <i>IL-4</i> -R   | 5'-GAAGCCCTACAGACGAGCTCA-3'     |
| <i>CCR1</i> -F   | 5'-AGGCCAGTGGGAGTTCAC-3'        |
| <i>CCR1</i> -R   | 5'-TCCACTGCTTCAGGCTCTTGT-3'     |
| <i>CCR2</i> -F   | 5'-TCATCCACGGCATACTATCAACA-3'   |
| <i>CCR2</i> -R   | 5'-GTGGCCCCCTTCATCAAGCT-3'      |
| <i>CCR3</i> -F   | 5'-GCTTTGAGACCACACCCTATGAA-3'   |
| <i>CCR3</i> -R   | 5'-GACCCAGCTCTTTGATTCTGA-3'     |
| <i>CCR4</i> -F   | 5'-AGAAAATTCATGCGAGGGAGAA-3'    |
| <i>CCR4</i> -R   | 5'-TGTCACTCAAGGGTCGTGTCA-3'     |
| <i>CCR5</i> -F   | 5'-AGGCCATGCAGGCAACAG-3'        |
| <i>CCR5</i> -R   | 5'-TCTCTCCAACAAAGGCATAGATGA-3'  |
| <i>CCR6</i> -F   | 5'-GAACTGCCCACTTCCCTTTCT-3'     |
| <i>CCR6</i> -R   | 5'-CAGGCTGGCGTGGTTCTCT-3'       |
| <i>CCR7</i> -F   | 5'-GCTCCAGGCACGCAACTTT-3'       |
| <i>CCR7</i> -R   | 5'-GACTACCACCACGGCAATGA-3'      |
| <i>CCR8</i> -F   | 5'-TGACCGACTACTACCCTGATTTCTT-3' |
| <i>CCR8</i> -R   | 5'-GCTGCCCCTGAGGAGGAA-3'        |
| <i>CCR9</i> -F   | 5'-TCTCAGTTCCTTACAACCTCCATT-3'  |
| <i>CCR9</i> -R   | 5'-CAGTTGGAGATGAACATGGCATA-3'   |

### ChIP-PCR Primers

|                  |                            |
|------------------|----------------------------|
| <i>Cxcr3</i> -3F | 5'-TTCCTGCCTGCTCCTAGACT-3' |
| <i>Cxcr3</i> -3R | 5'-CGCCTGTGGTCAGGTGAATA-3' |
| <i>Ifng</i> -3F  | 5'-GAGCCCAAGGAGTCGAAAGG-3' |
| <i>Ifng</i> -3R  | 5'-ATCGAAGGCTCCTCGGGAT-3'  |
| <i>CD44</i> -2F  | 5'-CACCGATCTGCTGATGTGGA-3' |
| <i>CD44</i> -2R  | 5'-GCACGCCATGGACAAGTTTT-3' |
| <i>Cnd2</i> -1F  | 5'-TCGGATAGGGGAACCCACAA-3' |

|                  |                              |
|------------------|------------------------------|
| <i>Ccnd2</i> -1R | 5'-CACACCCTTTATGCCCCCAT-3'   |
| <i>Ifng</i> -4F  | 5'-TCTCATCGTCAGAGAGCCCA-3'   |
| <i>Ifng</i> -4R  | 5'-GAAGGCTCCTCGGGATTACG-3'   |
| <i>Irf4</i> -2F  | 5'-CCTGTGCACTTCGGGTTTTG-3'   |
| <i>Irf4</i> -2R  | 5'-GGTCCTTTAGGAACCAGGGC-3'   |
| <i>Tbx21</i> -2F | 5'-TCCTGTATGCCCAGGCTTTG-3'   |
| <i>Tbx21</i> -2R | 5'-CGTGAACGAGCTTTTGTGGG-3'   |
| <i>Gata3</i> -2F | 5'-GAGACGGTTGCTCTTCCGAT-3'   |
| <i>Gata3</i> -2F | 5'-AGCTTGCGAAGACCTAGTGC-3'   |
| <i>Foxp3</i> -2F | 5'-CAGAGCCTTGTGCGTGTTAAA-3'  |
| <i>Foxp3</i> -2R | 5'-CATGTTTGTGCTGAGTGCCC-3'   |
| <i>Stat3</i> -2F | 5'-GCCGCTTCTGTGTCAGTTCTGT-3' |
| <i>Stat3</i> -2R | 5'-GGACACTTACATGGGGCAGG-3'   |
| <i>TGFβ1</i> -F  | 5'-GCCCGAAGCGGACTACTATG-3'   |
| <i>TGFβ1</i> -R  | 5'-GGGTAATTCCTCCC GG TGAC-3' |
| <i>Cxcr3</i> -4F | 5'-ACACACACCGTACATGCCTC-3'   |
| <i>Cxcr3</i> -4R | 5'-ACCAATTAGGGCTTGGGTGG-3'   |
| <i>Runx1</i> -2F | 5'-TTTACTGTAAGCCCGACCCG-3'   |
| <i>Runx1</i> -2R | 5'-CCAGGCTGATACCGGAAAGG-3'   |
| <i>Smad3</i> -F  | 5'-GAAAGGGACACACGCCACC-3'    |
| <i>Smad3</i> -R  | 5'-GCTTCTAGACCTCAAGGGTCG-3'  |
| <i>Rorc</i> -2F  | 5'-GGTGAGGTAGGACCGAGTCT-3'   |
| <i>Rorc</i> -2R  | 5'-CCCATCCTCTCGATCAAGCC-3'   |
